# Supplementary material for: Complexation, Molecular Forces, Digestibility, and Celiac–Related Peptides of Gluten Blend Meat Analogs with Redox Agents
Source: Research Square preprint supplement (doi:10.21203/rs.3.rs-8189126/v1), 2025-12-11
Supplement: Supplementary file 1 [file 65483fd56b5da282c4a28995.xlsx]

## Sheet: S2
		Table S2 Celiac-related peptides
	Meat analogs	No	A	Peptide
	WG	1	0.0357	SLQQPGQGQQIGQGQQGYYPTSPQHPGQ
		2	0.0357	YYPTSPQQPGQLQQPAQGQQGYYPTSPQ
		3	0.037	SQQPQQIFPQPQQTFPHQPQQAFPQPQ
		4	0.04	VLPQQPPFSQQQQPVLPPQQSPFPQ
		5	0.0417	VRVPVPQLQPQNPSQQHPQEQVPL
		6	0.0588	LASQQQPAQGQQGHYPA
		7	0.0625	QQQPLPPQQTFPQQPL
		8	0.0667	SQVQWPQQQPVPQPH
		9	0.08	NMQVDPGYQVQWPQQQPFPQPQQPF
		10	0.15	QQFPQPQQPQQSFPQQQRPF
		11	0.1579	VRVPVPQLQPKNPSQQQPQ
		12	0.1739	RVPVPQLQPKNPSQQQPQEQVPL
		13	0.1765	LQLQPFPQPQLPYPQPQ
		14	0.2353	VPVPQLQPQNPSQQQPQ
		15	0.3333	VQQQQFPGQQQPFPPQQPYPQPQPFPS
		16	0.12	LQLQPFPQPQLPYPQPHLPYPQPQP
		17	0.0625	PILPQQPPFSQQQQPQ
		18	0.125	SQQQQPVLPQQQPVII
		19	0.1053	GSFQPSQQNPQAQGSVQPQ
		20	0.24	SQQQQPPFSQQQPPFSQQQQPVIPQQPS
		21	0.15	RPQQPYPQSQPQYSQPQQPI
		22	0.0769	LQLQPFPQPQLPY
		23	0.0667	QSGQGQQGYYPTSPQ
		24	0.1562	LPQLPYPQPQPFPPQQSYPQPQPQYPQPQQPI
		25	0.1613	PQLPYPQPQPFPPQQSYPQPQPQYPQPQQPI
		26	0.1765	SHIPGLEKPSQQQPLPL
		27	0.2917	LQLQPFPQPQLPYPQPQLPYPQPQ
		28	0.3333	LGQQQQQFPGQQQPFPPQQPYPQPQPF
		29	0.1111	FLQPQQPQQSFPQQQQPL
		30	0.15	SHIPGLERPSQQQPLPPQQT
		31	0.25	RPQQPYPQSQPQ
		32	0.0526	LESQQPFPQQPQQPFPQPQ
		33	0.0769	LQQPPFSQQQQPV
		34	0.1	QQFPQPQQPQQSIPQQQQPL
		35	0.2903	QLQPFPQPQLPYPQPQLPYPQPQLPYPQPQP
		36	0.04	TQQSFPLQPQQPFPQQPQQPFPQPQ
		37	0.1	TQQSFPLQPQQPFPQQPQQPFPQPQLPFPQ
		38	0.1071	QSFPLQPQQPFPQQPQQPFPQPQLPFPQ
		39	0.1111	SFPLQPQQPFPQQPQQPFPQPQLPFPQ
		40	0.1111	SFRPSQQNPQAQGSVQPQ
		41	0.1154	NIQVDPSGQVQWPQQQQPFPQPQQPF
		42	0.2	SQQPQQPFPQQPHQPQQPYPQQQPY
		43	0.4516	VQQQQFPGQQQPFPPQQPYPQPQPFPSQQPY
		44	0.1111	VQWPQQQPF
		45	0.0455	LQLQPFPQPQPFLPQLPYPQPQ
		46	0.0476	FQPSQQNPQAQGSFQPQQLPQ
		47	0.1	SQQQPPFWQQQPPFSQQQPILPQQPPFSQQ
		48	0.28	LQLQPFPQPQLPYPQPQLPYPQPQP
		49	0.05	SQQPPISQQQQQQQQQQQPF
		50	0.08	NMQVDPSGQVQWPQQQPFPQPQQPF
		51	0.1176	LQLQPFPQPQLPYPQPH
		52	0.12	QLQPFPQPQLPYPQPHLPYPQPQPF
		53	0.1538	LQLQPFPQPQLPYPQPHLPYPQPQPF
		54	0.3182	VPVPQLQPQNPSQQQPQEQVPL
		55	0.0417	NIQVDPSGQVQWPQQQPFPQPQPF
		56	0.0556	NMQVDPSGQVQWPQQQPF
		57	0.0556	TQQPQQPFPQQPQQPFPQ
		58	0.0625	VQWPQQQPFPQPQQPF
		59	0.0769	QIIPQQPQQPFPL
		60	0.0833	FQPSQQNPQAQG
		61	0.1	QQLPQPQQPQQSFPQQQRPF
		62	0.1176	LQPQQPQQSFPQQQQPL
		63	0.1429	SQQQQPPFSQQQPPFSQQQQPVLPQQPS
		64	0.1538	FLQPQQPFPQQPQQPYPQQPQQPFPQ
		65	0.16	LQPQQPFPQQPQQPYPQQPQQPFPQ
		66	0.1667	LQLQPFPQPQLPYPQPQP
		67	0.1667	QLQPFPQPQLPYPQPQPF
		68	0.1818	EQSYPQQPYPS
		69	0.2105	VRVPVPQLQPQNPSQQQPQ
		70	0.2105	LQLQPFPQPQLPYPQPQPF
		71	0.25	LPYPQPQLPYPQPQPF
		72	0.2917	VRVPVPQLQPQNPSQQQPQEQVPL
		73	0.3125	LQLQPFPQPQLPYPQPQLPYPQPQLPYPQPQP
		74	0.3125	QLQPFPQPQLPYPQPQLPYPQPQLPYPQPQPF
		75	0.3333	RPQQPYPQPQPQ
		76	0.3529	LQPQNPSQQQPQEQVPL
		77	0.3636	LQLQPFPQPQLPYPQPQLPYPQPQLPYPQPQPF
		78	0.4444	SQPQPFRPQQPYPQPQPQ
		79	0.52	SHQQQPFPQQPYPQQPYPSQQPYPS
		80	0.5238	LGQQQPFPPQQPYPQPQPFPS
		81	0.5263	SHQQQPFPQQPYPQQPYPS
		82	0.0714	AGSFYPSETTPSQQ
		83	0.0588	FQPSQQNPQAQGSFQPQ
		84	0.3077	LQLQPFPQPQLPYPQPQLPYPQPQPF
		85	0.0455	LQLQPFPQPQPFPPQLPYPQPQ
		86	0.25	LQPFPQPQLPYPQPQLPYPQPQPF
		87	0.2	LQPFPSQQPY
		88	0.24	MQLQPFPQPQLPYPQPQLPYPQPQP
		89	0.2692	MQLQPFPQPQLPYPQPQLPYPQPQPF
		90	0.0714	PQQPPFSQQQQQPILPQQPPFSQQQQPV
		91	0.0417	SLQQPGQGQQIGQGQQGYYPTSPQ
		92	0.12	SQQPQQPFPQPQQPQQSFPQQQQPL
		93	0.15	SQQQPPFWQQQPPFSQQQPI
	WG-SPI	1	0.0769	QPLPQPQQPQQPF
		2	0.0625	PILPQQPPFSQQQQQP
		3	0.2105	QPQLPYPQPQLPYPQPQPF
		4	0.12	LQLQPFPQPQLPYPQPHLPYPQPQP
		5	0.1053	GSFQPSQQNPQAQGSVQPQ
		6	0.24	SQQQQPPFSQQQPPFSQQQQPVIPQQPS
		7	0.05	SQQPQQIFPQPQQTFPHQPQ
		8	0.0625	LQPGQGQQGYYPTSPQ
		9	0.0769	LQLQPFPQPQLPY
		10	0.0667	QSGQGQQGYYPTSPQ
		11	0.1562	LPQLPYPQPQPFPPQQSYPQPQPQYPQPQQPI
		12	0.1613	PQLPYPQPQPFPPQQSYPQPQPQYPQPQQPI
		13	0.1765	SHIPGLEKPSQQQPLPL
		14	0.2917	LQLQPFPQPQLPYPQPQLPYPQPQ
		15	0.3333	LGQQQQQFPGQQQPFPPQQPYPQPQPF
		16	0.25	RPQQPYPQSQPQ
		17	0.3043	LPYPQPQLPYPQPQLPYPQPQPF
		18	0.04	TQQSFPLQPQQPFPQQPQQPFPQPQ
		19	0.1	TQQSFPLQPQQPFPQQPQQPFPQPQLPFPQ
		20	0.1071	QSFPLQPQQPFPQQPQQPFPQPQLPFPQ
		21	0.1111	VQWPQQQPF
		22	0.1111	SFPLQPQQPFPQQPQQPFPQPQLPFPQ
		23	0.1111	SFRPSQQNPQAQGSVQPQ
		24	0.1154	NIQVDPSGQVQWPQQQQPFPQPQQPF
		25	0.2	SQQPQQPFPQQPHQPQQPYPQQQPY
		26	0.4516	VQQQQFPGQQQPFPPQQPYPQPQPFPSQQPY
		27	0.05	SQQPPISQQQQQQQQQQQPF
		28	0.08	NMQVDPSGQVQWPQQQPFPQPQQPF
		29	0.1176	LQLQPFPQPQLPYPQPH
		30	0.12	QLQPFPQPQLPYPQPHLPYPQPQPF
		31	0.1429	SQQPQQPFPQQPHQPQQPYPQ
		32	0.3182	VPVPQLQPQNPSQQQPQEQVPL
		33	0.0417	NIQVDPSGQVQWPQQQPFPQPQPF
		34	0.0556	NMQVDPSGQVQWPQQQPF
		35	0.0625	VQWPQQQPFPQPQQPF
		36	0.0769	QIIPQQPQQPFPL
		37	0.0833	FQPSQQNPQAQG
		38	0.1	QQLPQPQQPQQSFPQQQRPF
		39	0.1176	LQPQQPQQSFPQQQQPL
		40	0.1429	SQQQQPPFSQQQPPFSQQQQPVLPQQPS
		41	0.1538	FLQPQQPFPQQPQQPYPQQPQQPFPQ
		42	0.16	LQPQQPFPQQPQQPYPQQPQQPFPQ
		43	0.1667	QLQPFPQPQLPYPQPQPF
		44	0.1667	LQLQPFPQPQLPYPQPQP
		45	0.1818	EQSYPQQPYPS
		46	0.2105	VRVPVPQLQPQNPSQQQPQ
		47	0.2105	LQLQPFPQPQLPYPQPQPF
		48	0.2308	QQYPLGQGSFRPSQQNPQAQGSVQPQ
		49	0.25	RPQQPYPQPQPQYSQPQQPI
		50	0.25	LPYPQPQLPYPQPQPF
		51	0.2917	VRVPVPQLQPQNPSQQQPQEQVPL
		52	0.3125	QLQPFPQPQLPYPQPQLPYPQPQLPYPQPQPF
		53	0.3125	LQLQPFPQPQLPYPQPQLPYPQPQLPYPQPQP
		54	0.3333	RPQQPYPQPQPQ
		55	0.3529	LQPQNPSQQQPQEQVPL
		56	0.3636	LQLQPFPQPQLPYPQPQLPYPQPQLPYPQPQPF
		57	0.4444	SQPQPFRPQQPYPQPQPQ
		58	0.52	SHQQQPFPQQPYPQQPYPSQQPYPS
		59	0.5238	LGQQQPFPPQQPYPQPQPFPS
		60	0.5263	SHQQQPFPQQPYPQQPYPS
		61	0.64	LGQQQPFPPQQPYPQPQPFPSQQPY
	WG-SPI+LC+AA	1	0.0476	QSGQGQQPGQGQQGYYPTSPQ
		2	0.0769	QQPPPFSQQQQPV
		3	0.0625	PILPQQPPFSQQQQPQ
		4	0.125	SQQQQPVLPQQQPVII
		5	0.24	QPQLPYPQPQLPYPQPQLPYPQPQP
		6	0.1053	GSFQPSQQNPQAQGSVQPQ
		7	0.24	SQQQQPPFSQQQPPFSQQQQPVIPQQPS
		8	0.0667	QPGQGQQGYYPTSPQ
		9	0.0667	QSGQGQQGYYPTSPQ
		10	0.1562	LPQLPYPQPQPFPPQQSYPQPQPQYPQPQQPI
		11	0.1613	PQLPYPQPQPFPPQQSYPQPQPQYPQPQQPI
		12	0.1765	SHIPGLEKPSQQQPLPL
		13	0.3333	LGQQQQQFPGQQQPFPPQQPYPQPQPF
		14	0.0625	QLPGQGQQGYYPTSPQ
		15	0.1765	VQWPQQQQPFPQPQQPF
		16	0.25	QLQPFPQPQLPYPQPQLPYPQPQP
		17	0.0526	LESQQPFPQQPQQPFPQPQ
		18	0.0769	LQQPPFSQQQQPV
		19	0.1	QQFPQPQQPQQSIPQQQQPL
		20	0.2903	QLQPFPQPQLPYPQPQLPYPQPQLPYPQPQP
		21	0.3043	LPYPQPQLPYPQPQLPYPQPQPF
		22	0.04	TQQSFPLQPQQPFPQQPQQPFPQPQ
		23	0.1	TQQSFPLQPQQPFPQQPQQPFPQPQLPFPQ
		24	0.1071	QSFPLQPQQPFPQQPQQPFPQPQLPFPQ
		25	0.1111	VQWPQQQPF
		26	0.1111	SFPLQPQQPFPQQPQQPFPQPQLPFPQ
		27	0.1111	SFRPSQQNPQAQGSVQPQ
		28	0.1154	NIQVDPSGQVQWPQQQQPFPQPQQPF
		29	0.2	SQQPQQPFPQQPHQPQQPYPQQQPY
		30	0.4516	VQQQQFPGQQQPFPPQQPYPQPQPFPSQQPY
		31	0.0588	FQPSQQNPQAQGSFQPQ
		32	0.0357	PQQPPFSQQQLPPFSQQLPPFSQQQQPV
		33	0.0769	VQWPQQQPVPQPH
		34	0.28	QLQPFPQPQLPYPQPQLPYPQPQPF
		35	0.0588	LQPQQPFPQQPQQPFPQ
		36	0.1176	IQPQQPFPQQPQQPFPQ
		37	0.0417	NIQVDPSGQVQWPQQQPFPQPQPF
		38	0.0556	NMQVDPSGQVQWPQQQPF
		39	0.0556	TQQPQQPFPQQPQQPFPQ
		40	0.0625	VQWPQQQPFPQPQQPF
		41	0.0769	QIIPQQPQQPFPL
		42	0.0833	FQPSQQNPQAQG
		43	0.1	QQLPQPQQPQQSFPQQQRPF
		44	0.1176	LQPQQPQQSFPQQQQPL
		45	0.1429	SQQQQPPFSQQQPPFSQQQQPVLPQQPS
		46	0.1538	FLQPQQPFPQQPQQPYPQQPQQPFPQ
		47	0.16	LQPQQPFPQQPQQPYPQQPQQPFPQ
		48	0.1667	QLQPFPQPQLPYPQPQPF
		49	0.1667	LQLQPFPQPQLPYPQPQP
		50	0.1818	EQSYPQQPYPS
		51	0.2105	VRVPVPQLQPQNPSQQQPQ
		52	0.2105	LQLQPFPQPQLPYPQPQPF
		53	0.25	RPQQPYPQPQPQYSQPQQPI
		54	0.25	LPYPQPQLPYPQPQPF
		55	0.3125	QLQPFPQPQLPYPQPQLPYPQPQLPYPQPQPF
		56	0.3125	LQLQPFPQPQLPYPQPQLPYPQPQLPYPQPQP
		57	0.3333	RPQQPYPQPQPQ
		58	0.3529	LQPQNPSQQQPQEQVPL
		59	0.3636	LQLQPFPQPQLPYPQPQLPYPQPQLPYPQPQPF
		60	0.4444	SQPQPFRPQQPYPQPQPQ
		61	0.52	SHQQQPFPQQPYPQQPYPSQQPYPS
		62	0.5238	LGQQQPFPPQQPYPQPQPFPS
		63	0.5263	SHQQQPFPQQPYPQQPYPS
		64	0.64	LGQQQPFPPQQPYPQPQPFPSQQPY
		65	0.0714	AGSFYPSETTPSQQ
		66	0.08	AQLPFPQQPQQPFPQPQQPQQPFPQ
		67	0.3077	LQLQPFPQPQLPYPQPQLPYPQPQPF
		68	0.0455	LQLQPFPQPQPFPPQLPYPQPQ
		69	0.2	LQPFPSQQPY
		70	0.0385	LVLPQQPPFSQQQQPVLPPQQSPFPQ
		71	0.24	MQLQPFPQPQLPYPQPQLPYPQPQP
		72	0.2692	MQLQPFPQPQLPYPQPQLPYPQPQPF
		73	0.0714	PQQPPFSQQQQQPILPQQPPFSQQQQPV
		74	0.0417	SLQQPGQGQQIGQGQQGYYPTSPQ
		75	0.12	SQQPQQPFPQPQQPQQSFPQQQQPL
		76	0.1034	SQQQLPPFSQQQQPPFSQQQQPVLPQQPS
	WG-PPI	1	0.0345	FSQSQQPFPQQPQQPFPLQPQQPFPQQPA
		2	0.1176	QVQWPQQQPFPQPQQPF
		3	0.2222	LPYPQPQPF
		4	0.3	QPFPQPQLPYPQPQLPYPQPQLPYPQPQPF
		5	0.0968	SQQQPPFWQQQPPFSQQQPILPQQPPFSQQQ
		6	0.15	RPQQPYPQSQPQYSQPQQPI
		7	0.0625	LQPGQGQQGYYPTSPQ
		8	0.0769	LQLQPFPQPQLPY
		9	0.0667	QSGQGQQGYYPTSPQ
		10	0.1562	LPQLPYPQPQPFPPQQSYPQPQPQYPQPQQPI
		11	0.1613	PQLPYPQPQPFPPQQSYPQPQPQYPQPQQPI
		12	0.1765	SHIPGLEKPSQQQPLPL
		13	0.2917	LQLQPFPQPQLPYPQPQLPYPQPQ
		14	0.3333	LGQQQQQFPGQQQPFPPQQPYPQPQPF
		15	0.0345	VYYPTSPQQPGQLQQPAQGQQGYYPTSPQ
		16	0.0625	VQWPQQQPVPQPHQPF
		17	0.0714	VQIIPQQPQQPFPL
		18	0.0769	PQQPPFSQQQQPV
		19	0.1071	SQQQPPFWQQQPPFSQQQPILPQQPPFS
		20	0.1429	SQPQQQFPQPQQPQQSFPQQQPPFIQPS
		21	0.05	SQQPPISQQQQQQQQQQQPF
		22	0.08	NMQVDPSGQVQWPQQQPFPQPQQPF
		23	0.1176	LQLQPFPQPQLPYPQPH
		24	0.12	QLQPFPQPQLPYPQPHLPYPQPQPF
		25	0.1429	SQQPQQPFPQQPHQPQQPYPQ
		26	0.1538	LQLQPFPQPQLPYPQPHLPYPQPQPF
		27	0.3182	VPVPQLQPQNPSQQQPQEQVPL
		28	0.0357	PQQPPFSQQQLPPFSQQLPPFSQQQQPV
		29	0.0476	QLQPFPQPQPFPPQLPYPQPQ
		30	0.0588	FQPSQQNPQAQGSFQPQ
		31	0.0769	VQWPQQQPVPQPH
		32	0.12	PLQPQQPFPQQPQQPFPQPQLPFPQ
		33	0.28	QLQPFPQPQLPYPQPQLPYPQPQPF
		34	0.0417	NIQVDPSGQVQWPQQQPFPQPQPF
		35	0.0556	NMQVDPSGQVQWPQQQPF
		36	0.0625	VQWPQQQPFPQPQQPF
		37	0.0769	QIIPQQPQQPFPL
		38	0.0833	QLPFPQQPQQPFPQPQQPQQPFPQ
		39	0.0833	FQPSQQNPQAQG
		40	0.1	QQLPQPQQPQQSFPQQQRPF
		41	0.1176	LQPQQPQQSFPQQQQPL
		42	0.1429	SQQQQPPFSQQQPPFSQQQQPVLPQQPS
		43	0.1538	FLQPQQPFPQQPQQPYPQQPQQPFPQ
		44	0.16	LQPQQPFPQQPQQPYPQQPQQPFPQ
		45	0.1667	QLQPFPQPQLPYPQPQPF
		46	0.1667	LQLQPFPQPQLPYPQPQP
		47	0.2105	VRVPVPQLQPQNPSQQQPQ
		48	0.2105	LQLQPFPQPQLPYPQPQPF
		49	0.2308	QQYPLGQGSFRPSQQNPQAQGSVQPQ
		50	0.25	RPQQPYPQPQPQYSQPQQPI
		51	0.25	LPYPQPQLPYPQPQPF
		52	0.2917	VRVPVPQLQPQNPSQQQPQEQVPL
		53	0.3125	QLQPFPQPQLPYPQPQLPYPQPQLPYPQPQPF
		54	0.3125	LQLQPFPQPQLPYPQPQLPYPQPQLPYPQPQP
		55	0.3333	RPQQPYPQPQPQ
		56	0.3529	LQPQNPSQQQPQEQVPL
		57	0.3636	LQLQPFPQPQLPYPQPQLPYPQPQLPYPQPQPF
		58	0.4444	SQPQPFRPQQPYPQPQPQ
		59	0.52	SHQQQPFPQQPYPQQPYPSQQPYPS
		60	0.5238	LGQQQPFPPQQPYPQPQPFPS
		61	0.5263	SHQQQPFPQQPYPQQPYPS
		62	0.64	LGQQQPFPPQQPYPQPQPFPSQQPY
		63	0.0455	LQLQPFPQPQPFLPQLPYPQPQ
		64	0.0476	FQPSQQNPQAQGSFQPQQLPQ
		65	0.1	SQQQPPFWQQQPPFSQQQPILPQQPPFSQQ
		66	0.28	LQLQPFPQPQLPYPQPQLPYPQPQP
		67	0.0714	AGSFYPSETTPSQQ
		68	0.08	AQLPFPQQPQQPFPQPQQPQQPFPQ
		69	0.3077	LQLQPFPQPQLPYPQPQLPYPQPQPF
		70	0.0455	LQLQPFPQPQPFPPQLPYPQPQ
		71	0.25	LQPFPQPQLPYPQPQLPYPQPQPF
		72	0.24	MQLQPFPQPQLPYPQPQLPYPQPQP
		73	0.2609	QPFPQPQLPYPQPQLPYPQPQPF
		74	0.0417	SLQQPGQGQQIGQGQQGYYPTSPQ
		75	0.12	SQQPQQPFPQPQQPQQSFPQQQQPL
		76	0.1034	SQQQLPPFSQQQQPPFSQQQQPVLPQQPS
		77	0.15	SQQQPPFWQQQPPFSQQQPI
		78	0.0714	PQQPPFSQQQQQPILPQQPPFSQQQQPV
	WG-PPI+LC+AA	1	0.0455	SQQQLPPFSQQLPPFSQQQQPV
		2	0.0714	ILQQPPFSQQQQPV
		3	0.08	PELQQPIPQQPQQPFPLQPQQPFPQ
		4	0.3043	RVPVPQLQPQNPSQQQPQEQVPL
		5	0.3333	VRFPVPQLQPQNPSQQQPQEQVPL
		6	0.1111	FLQPQQPQQSFPQQQQPL
		7	0.15	SHIPGLERPSQQQPLPPQQT
		8	0.25	RPQQPYPQSQPQ
		9	0.0625	QLPGQGQQGYYPTSPQ
		10	0.25	QLQPFPQPQLPYPQPQLPYPQPQP
		11	0.0526	LESQQPFPQQPQQPFPQPQ
		12	0.0769	LQQPPFSQQQQPV
		13	0.1	QQFPQPQQPQQSIPQQQQPL
		14	0.2903	QLQPFPQPQLPYPQPQLPYPQPQLPYPQPQP
		15	0.04	TQQSFPLQPQQPFPQQPQQPFPQPQ
		16	0.1	TQQSFPLQPQQPFPQQPQQPFPQPQLPFPQ
		17	0.1071	QSFPLQPQQPFPQQPQQPFPQPQLPFPQ
		18	0.1111	VQWPQQQPF
		19	0.1111	SFRPSQQNPQAQGSVQPQ
		20	0.1154	NIQVDPSGQVQWPQQQQPFPQPQQPF
		21	0.4516	VQQQQFPGQQQPFPPQQPYPQPQPFPSQQPY
		22	0.0345	VYYPTSPQQPGQLQQPAQGQQGYYPTSPQ
		23	0.0625	VQWPQQQPVPQPHQPF
		24	0.0667	VVQIIPQQPQQPFPL
		25	0.0714	VQIIPQQPQQPFPL
		26	0.0769	PQQPPFSQQQQPV
		27	0.1071	SQQQPPFWQQQPPFSQQQPILPQQPPFS
		28	0.1429	SQPQQQFPQPQQPQQSFPQQQPPFIQPS
		29	0.05	SQQPPISQQQQQQQQQQQPF
		30	0.0588	FQPSQQNPQAQGSFQPQ
		31	0.08	NMQVDPSGQVQWPQQQPFPQPQQPF
		32	0.1176	LQLQPFPQPQLPYPQPH
		33	0.12	QLQPFPQPQLPYPQPHLPYPQPQPF
		34	0.1538	LQLQPFPQPQLPYPQPHLPYPQPQPF
		35	0.3182	VPVPQLQPQNPSQQQPQEQVPL
		36	0.0357	PQQPPFSQQQLPPFSQQLPPFSQQQQPV
		37	0.0476	QLQPFPQPQPFPPQLPYPQPQ
		38	0.0769	VQWPQQQPVPQPH
		39	0.12	PLQPQQPFPQQPQQPFPQPQLPFPQ
		40	0.28	QLQPFPQPQLPYPQPQLPYPQPQPF
		41	0.0417	NIQVDPSGQVQWPQQQPFPQPQPF
		42	0.0556	NMQVDPSGQVQWPQQQPF
		43	0.0625	VQWPQQQPFPQPQQPF
		44	0.0833	FQPSQQNPQAQG
		45	0.1	QQLPQPQQPQQSFPQQQRPF
		46	0.1176	LQPQQPQQSFPQQQQPL
		47	0.1429	SQQQQPPFSQQQPPFSQQQQPVLPQQPS
		48	0.1538	FLQPQQPFPQQPQQPYPQQPQQPFPQ
		49	0.16	LQPQQPFPQQPQQPYPQQPQQPFPQ
		50	0.1667	QLQPFPQPQLPYPQPQPF
		51	0.1667	LQLQPFPQPQLPYPQPQP
		52	0.1818	EQSYPQQPYPS
		53	0.2105	VRVPVPQLQPQNPSQQQPQ
		54	0.2105	LQLQPFPQPQLPYPQPQPF
		55	0.2308	QQYPLGQGSFRPSQQNPQAQGSVQPQ
		56	0.25	RPQQPYPQPQPQYSQPQQPI
		57	0.25	LPYPQPQLPYPQPQPF
		58	0.2917	VRVPVPQLQPQNPSQQQPQEQVPL
		59	0.3125	QLQPFPQPQLPYPQPQLPYPQPQLPYPQPQPF
		60	0.3125	LQLQPFPQPQLPYPQPQLPYPQPQLPYPQPQP
		61	0.3333	RPQQPYPQPQPQ
		62	0.3529	LQPQNPSQQQPQEQVPL
		63	0.3636	LQLQPFPQPQLPYPQPQLPYPQPQLPYPQPQPF
		64	0.4444	SQPQPFRPQQPYPQPQPQ
		65	0.52	SHQQQPFPQQPYPQQPYPSQQPYPS
		66	0.5238	LGQQQPFPPQQPYPQPQPFPS
		67	0.5263	SHQQQPFPQQPYPQQPYPS
		68	0.64	LGQQQPFPPQQPYPQPQPFPSQQPY
		69	0.0455	LQLQPFPQPQPFLPQLPYPQPQ
		70	0.0476	FQPSQQNPQAQGSFQPQQLPQ
		71	0.1	SQQQPPFWQQQPPFSQQQPILPQQPPFSQQ
		72	0.28	LQLQPFPQPQLPYPQPQLPYPQPQP
		73	0.0714	AGSFYPSETTPSQQ
		74	0.08	AQLPFPQQPQQPFPQPQQPQQPFPQ
		75	0.3043	LPYPQPQLPYPQPQLPYPQPQPF
		76	0.3077	LQLQPFPQPQLPYPQPQLPYPQPQPF
		77	0.0455	LQLQPFPQPQPFPPQLPYPQPQ
		78	0.2	LQPFPSQQPY
		79	0.24	MQLQPFPQPQLPYPQPQLPYPQPQP
		80	0.2692	MQLQPFPQPQLPYPQPQLPYPQPQPF
		81	0.0714	PQQPPFSQQQQQPILPQQPPFSQQQQPV
		82	0.417	SLQQPGQGQQIGQGQQGYYPTSPQ
		83	0.12	SQQPQQPFPQPQQPQQSFPQQQQPL
		84	0.1034	SQQQLPPFSQQQQPPFSQQQQPVLPQQPS
		85	0.0667	SQQQPGQGQQGHYPA
		86	0.15	SQQQPPFWQQQPPFSQQQPI
