# Supplementary material for: Complexation, Molecular Forces, Digestibility, and Celiac–Related Peptides of Gluten Blend Meat Analogs with Redox Agents
Source: Research Square preprint supplement (doi:10.21203/rs.3.rs-8189126/v1), 2025-12-11
Supplement: Supplementary file 2 [file 954a6acab7e0c09ec2c1c38c.xlsx]

## Sheet: S1
			Table S1 Identified peptide from database Triticum aestivum 4565
	Meat Analogs	No	Peptide	-10lgP	Mass	Length	Accession
	WG	1	SQQQQVGQGSLVQGQ	42.8	1570.77	15	513129937:513129955:15148398:513129957:421932705:327178025:34329283:209971869:205363294
		2	SHQQQPFPQQPYPQQPYPS	41.29	2281.06	19	508732623:1389715110:1282798550:1863295322:1389715540:1282798552:208605344:1282798551:1389714864:1863295324:513130101:1245682573
		3	FQPSQQNPQAQGSFQPQ	40.33	1915.88	17	74026515:170712:421932488:601292788
		4	SLQQPGQGQQQGQGQQGYYPT	40.04	2277.04	21	226438082:39599016:359500293:39599020:262205143:346680619:194718431:121452:21779:161344745:874510007:188011167:187937727:874510009:110341802:164457873:21751
		5	QQFPQPQQPQQSFPQQQRPF	39.92	2468.2	20	2123593972:478683577:1389711682:1282797655
		6	VRVPVPQLQPQNPSQQQPQ	39.08	2167.15	19	7209265:90101520:21673:2123921189:74026515:902376029:2123921187:74026517:154268814:79013966:154268822:421932488:2123921184:147883560:601292788:7209255:421932498:147883554:1258169877:1389815507:383210741:383210739:1389814898:1258169876:1894615065:1258169881:1389817894:1389817296:383210742:1389816679:383210745:1258169879:1258169880:513129839:807780726
		7	SQRPQQPFPLQPQQPF	38.59	1921.98	16	229610232:229610226:229610234:229610228:224747067
		8	SSQQGSYYPGQASPQ	38.33	1583.69	15	162415987:21749:110341797:146261040:1092945066
		9	YSSSLQQPGQGLQGHYPA	38.31	1916.9	18	226223:2569237885:22090:2569237814:584090046:110341796:2123603159:557367908:14329763:346680615:359500291:2569237937:2569237794:1090936466
		10	LQLQPFPQPQPFPPQLPYPQPQ	38.28	2584.35	22	147883560:601292788:421932498:147883554:513129839:401787282:807780656
		11	LQLQPFPQPQLPYPQPQPF	37.68	2262.18	19	74026515:74026517:170712
		12	LQPQQPQQSFPQQQQPL	37.54	2019.02	17	209971851:209971883
		13	QLGQGQQSGQGQLGYYPTSPQ	37.47	2221.04	21	345846576:21743:110341791:170743
		14	LQLQPFPQPQLPYPQPQ	37.13	2018.06	17	7209265:90101520:21673:2123921189:74026515:74026517:170712
		15	QQLPQPQQPQQSFPQQQRPF	37	2434.21	20	513129937:513129955:15148398:513129957:421932705:327178025:34329283
		16	LQLQPFPQPQLPYPQPHLPYPQPQP	36.76	2947.54	25	902376029:2123921187
		17	NIQVDPSGQVQWPQQQPFPQPQPF	36.53	2789.36	24	379319139:379319145:379319143:194718421:379319141
		18	AGSFYPSETTPSQQ	36.44	1498.66	14	162415987:21749:110341797
		19	SFQPSQLNPQAQGSVQPQ	36.38	1939.94	18	147883554:1256786:401787290
		20	AQGTFLQPHQIAQLEVMTSIALR	36.08	2551.36	23	163860188:164470666:17425212:85815962:9967353:39923010:1860560341:85815960:39923100:21773:85815958:123204244:17425188:85815966:85815964:164470654:44885910:169666925:56480740:407907621:407907619:78059071:89357853:51870700:44885908:169666935:169666933:169666941:169666937:169666929
		21	SSSLQQPGQGLQGHYPA	35.87	1753.84	17	226223:2569237885:22090:2569237814:584090046:110341796:2123603159:557367908:14329763:346680615:359500291:2569237937:2569237794:1090936466
		22	YFIALPVPSQPVDPR	35.78	1697.91	15	1150017191:1905425421:1905425429:1905425419:1905425387:123957:1905425391:1894583401:1905425385:21713:1905425397:1905425431:2234200264:1905425389:1905425393:38098487:1905425423:1634548348:1894588267:2123816602
		23	IALPVPSQPVDPR	35.73	1387.78	13	1150017191:1905425421:1905425429:1905425419:1905425387:123957:1905425391:1894583401:1905425385:21713:1905425397:1905425431:2234200264:1905425389:1905425393:38098487:1905425423:1634548348:1894588267:2123816602
		24	GGSFYPGETTPPQQ	35.71	1464.65	14	345846576:21743:110341791:170743:1090936466:662357279:296280726:736319:478428127:399933061:26515125:61966513:194077448
		25	LQLQPFPQPQLPYPQPQLPYPQPQP	35.42	2938.54	25	2123921189
		26	MQLQPFPQPQLPYPQPQLPYPQPQPF	35.31	3103.56	26	2123921184
		27	GGSFYPGETTPPQ	34.94	1336.59	13	345846576:21743:110341791:170743:1090936466:662357279:296280726:736319:478428127:399933061:26515125:61966513:194077448
		28	SLQQPGQGQQIGQGQQGYYPTSPQHPGQ	34.9	2993.4	28	226223:2569237885:22090:2569237814:584090046:110341796:2123603159:557367908:14329763:346680615:359500291:2569237937:2569237794:570441545
		29	TLGVDDQPLFHG	34.88	1297.63	12	1894630985:2123835923:1894595286:1894630983:1894630986:2123817554:1894630982:1894630984
		30	TQQSFPLQPQQPFPQQPQQPFPQPQLPFPQ	34.84	3527.76	30	508732623:1389715110:1282798550:1863295322:1389715540:1282798552
		31	SHIPGLEKPSQQQPLPL	34.58	1868.02	17	17425188:85815966:85815964:17425164:92429653
		32	SLQQPGQQGHYPTS	34.5	1526.71	14	226438082:39599016:359500293:39599020:262205143:346680619:194718431:121452:21779:161344745:874510007:188011167:187937727:874510009
		33	GVQILRPLFQLAQGLGIIQPQQPA	33.97	2584.49	24	478683585
		34	SLQQPGQGQQIGK	33.86	1367.72	13	226438082:39599016:359500293:39599020:262205143:346680619:194718431:121452:21779:161344745:874510007:188011167:187937727:110341802:164457873:21751
		35	YYPTSPQQPGQLQQPAQGQQGYYPTSPQ	33.55	3136.45	28	162415987:21749:110341797
		36	VQPQQLPQFEEIR	33.19	1610.84	13	7209265:90101520:21673:2123921189:902376029:2123921187:74026517:154268814:79013966:154268822:2123921184:147883560:7209255:421932498:1258169877:1389815507:383210741:383210739:1389814898:1258169876:1894615065:1258169881:1389817894:1389817296:383210742:1389816679:383210745:1258169879:1258169880:513129839:807780726:154268810:1256791:401787282:7209261:513129818
		37	IFLPLSQQQQVGQGSLVQGQGIIQPQQPA	33.18	3086.65	29	513129937:513129955:15148398:513129957:421932705:327178025:34329283:209971869:205363294
		38	SSLQPEQGQQGYYPT	33.12	1681.76	15	345846576:21743:110341791:170743
		39	LQLQPFPQPQLPYPQPQLPYPQPQLPYPQPQPF	33.07	3909.03	33	7209265:90101520:21673
		40	IISQQPFPLQPQQPF	33.06	1766.94	15	229610226:229610234:229610228
		41	LISQQPFPLQPQQPF	33.06	1766.94	15	229610232
		42	LQLQPFPQPQLPYPQPQLPYPQPQPF	33.04	3085.61	26	2123921189
		43	QLQPFPQPQLPYPQPQLPYPQPQLPYPQPQPF	32.91	3795.95	32	7209265:90101520:21673
		44	FQQPHQPFPQPQ	32.55	1477.71	12	2123593972:478683577:1389711682:1282797655:513129959
		45	SLQQPGQGQQIGQGQQGYYPTSPQ	32.24	2574.21	24	226223:2569237885:22090:2569237814:584090046:110341796:2123603159:557367908:14329763:346680615:359500291:2569237937:2569237794:226438082:39599016:359500293:39599020:262205143:346680619:194718431:121452:21779:161344745:874510007:188011167:187937727:570441545
		46	WQELGQGQQGYYPT	32.23	1653.74	14	226223:2569237885:22090:2569237814:584090046:110341796:2123603159:557367908:14329763:346680615:359500291:2569237937:2569237794:570441545
		47	QLQPFPQPQLPYPQPQLPYPQPQLPYPQPQP	32.18	3648.88	31	7209265:90101520:21673
		48	SFRPSQQNPQAQGSVQPQ	32.1	1982.96	18	74026517:79013966:154268822:147883560:7209255:807780726:154268810:1256791:513129818
		49	LQLQPFPQPQLPYPQPH	32.09	2027.06	17	902376029:2123921187
		50	VQWPQQQPFPQPQQPF	32	1978.97	16	209971869:209971857:209971909:209971889
		51	NMQVDPSGQVQWPQQQPFPQPQQPF	31.84	2935.37	25	209971869:209971857:209971889
		52	FQPSQQNPQAQGSFQPQQLPQ	31.49	2382.14	21	74026515:170712:421932488:601292788
		53	SFQQPQQQYPSGQ	31.44	1521.68	13	7209265:90101520:21673:2123921189:74026515:902376029:2123921187:170712:421932488:513129818
		54	RPQQPYPQPQPQ	31.3	1462.73	12	2123921189:74026515:902376029:2123921187:74026517:170712:154268814:79013966:154268822:154268810:1256791:7209261
		55	LESQQPFPQQPQQPFPQPQ	31.26	2248.09	19	208605344:1282798551:1389714864:1863295324:513130101
		56	SISGSAVSTEPGNTPR	31.25	1558.76	16	253783731:21701
		57	LQLQPFPQPQPF	31.12	1438.76	12	421932488:147883560:601292788:421932498:147883554:513129839:807780726:401787282:513129818:1256786:401787290:807780656:21765:170718
		58	SLHQSGQGQQGYYPS	31.07	1635.73	15	226223:2569237885:22090:2569237814:584090046:110341796:2123603159:557367908:14329763:346680615:359500291:2569237937:2569237794:570441545:874510009
		59	QTQQPFPLQPQQPFPQQPQRPF	31.01	2661.35	22	229610232:229610226:229610234:229610228:224747067
		60	QQLGQGQQIGQPGQ	30.98	1465.73	14	226438082:39599016:359500293:39599020:262205143:346680619:194718431:121452:21779:161344745:874510007:188011167:187937727:874510009
		61	SQQQQIPVIHPSV	30.97	1459.78	13	215402078:41745895:227344088
		62	QSGQGQQPGQGQSGYFPTS	30.9	1937.85	19	162415987:21749:110341797:146261040
		63	PQLPYPQPQPFPPQQSYPQPQPQYPQPQQPI	30.89	3637.8	31	1258169877:1389815507:383210741:383210739:1389814898:1258169876:1894615065:1258169881:1389817894:1389817296:383210742:1389816679:383210745:1258169879:1258169880
		64	SLQQSGQGQPGYYPT	30.86	1609.74	15	662357279:296280726:736319:478428127:399933061:26515125:61966513:194077448
		65	SHQQQPFPQQPYPQQPYPSQQPYPS	30.82	2981.37	25	508732623:1389715110:1282798550:1863295322:1389715540:1282798552:208605344:1282798551:1389714864:1863295324:513130101:1245682573
		66	SGPELTIEMILQAAQPK	30.67	1824.97	17	1894630985:2123835923:1894595286:1894630983:1894630986:2123817554:1894630982:1894630984
		67	SQQQQPPFSQQQPPFSQQQQPVIPQQPS	30.65	3216.56	28	17425188:85815966
		68	SQQQQPPFSQQQPPFSQQQQPVLPQQPS	30.65	3216.56	28	85815964:164470654:44885910:169666925
		69	QSFPLQPQQPFPQQPQQPFPQPQLPFPQ	30.48	3298.66	28	508732623:1389715110:1282798550:1863295322:1389715540:1282798552
		70	NMQVDPSGQVQWPQQQPF	30.36	2112.97	18	209971869:555948556:2123576886:1282796723:260401168:555948554:478683581:2123576888:1894510589:209971853:1389710910:1894510590:1389713935:555948542:1282796722:421932703:478683579:555948540:555948562:209971885:209971857:209971911:513129969:209971889
		71	NMQVDPGYQVQWPQQQPFPQPQQPF	30.22	3011.4	25	209971909
		72	NIQVDPSGQVQWPQQQQPFPQPQQPF	30.18	3045.47	26	15148387:478683569
		73	SIILQEQQQG	29.82	1142.59	10	17425196:322422042:17425194:336092107:85815954:108885285:17425192:336092053:336092105:56480735:56480733:162414846:85815956:260594504:164470674:89357853:9967351:17425210
		74	FPQPQQTFPHQPQQQVPQPQQPQQPF	29.78	3109.52	26	513129937:513129955:15148398:513129957:421932705:327178025:34329283:2123593972:478683577:1389711682:1282797655:513129959:513129914
		75	QLQPFPQPQLPYPQPQPF	29.64	2149.1	18	74026515:74026517:170712
		76	SLQQPGQGQQIGKGQQGYYPT	29.64	2262.1	21	110341802:164457873:21751
		77	GSVQPQQLPQFEEI	29.63	1598.79	14	7209265:90101520:21673:2123921189:902376029:2123921187:74026517:154268814:79013966:154268822:2123921184:147883560:7209255:421932498:513129839:807780726:154268810:1256791:401787282:7209261:513129818
		78	SFQQPQQQYPSGQG	29.56	1578.71	14	7209265:90101520:21673:2123921189:74026515:902376029:2123921187:170712:421932488:513129818
		79	LQLQPFPQPQPFLPQLPYPQPQ	29.5	2600.38	22	421932488:807780726:1256786:401787290:21765:170718
		80	YQQPQHTFPQPQ	29.43	1497.7	12	555948556:2123576886:1282796723:260401168:555948554:478683581:2123576888:1894510589:209971853:1389710910:1894510590:1389713935:555948542:1282796722:421932703:478683579:555948540:555948562:209971885
		81	LPQLPYPQPQPFPPQQSYPQPQPQYPQPQQPI	29.24	3750.88	32	1258169877:1389815507:383210741:383210739:1389814898:1258169876:1894615065:1258169881:1389817894:1389817296:383210742:1389816679:383210745:1258169879:1258169880
		82	SLQQPGQGQQGHYPA	29.24	1594.75	15	226223:2569237885:22090:2569237814:584090046:110341796:2123603159:557367908:14329763:346680615:359500291:2569237937:2569237794:226438082:39599016:359500293:39599020:262205143:346680619:194718431:121452:21779:161344745:874510007:188011167:187937727:570441545:874510009:1090936466:110341802:164457873:21751:1092945066
		83	SQQPPISQQQQQQQQQQQPF	29.04	2408.15	20	215402078:41745895:227344088
		84	SQQPQQPFPQPQQPQQSFPQQQQPL	29.03	2943.43	25	555948556:2123576886:1282796723:260401168:555948554:478683581:2123576888:1894510589:209971853:1389710910:1894510590:1389713935:555948542:1282796722:421932703:478683579:555948540:555948562:209971885:209971911:513129969:209971843
		85	SQQPQQSQQSFPQPQPQQPQQPSILQPQQPF	29.01	3583.74	31	208605344:1282798551:1389714864:1863295324:513130101
		86	VPVPQLQPQNPSQQQPQEQVPL	28.94	2478.29	22	7209265:90101520:21673:2123921189:74026515:902376029:2123921187:74026517:154268814:79013966:154268822:421932488:2123921184:147883560:601292788:7209255:421932498:147883554:1258169877:1389815507:383210741:383210739:1389814898:1258169876:1894615065:1258169881:1389817894:1389817296:383210742:1389816679:383210745:1258169879:1258169880
		87	LGQQQPFPPQQPYPQPQPFPS	28.93	2405.18	21	74026517:154268814:79013966:154268822:7209255:807780656
		88	YQPQQPFPQQPGQIIPQQPQQPSPLQPQQPF	28.92	3593.81	31	224747067
		89	QQQPLPPQQTFPQQPL	28.91	1873.97	16	163860188:164470666:17425212:85815962:9967353:39923010:1860560341:85815960:39923100:21773:85815958:123204244:9967351:17425182
		90	GGSFYPGETTPL	28.87	1224.57	12	226223:2569237885:22090:2569237814:584090046:110341796:2123603159:557367908:14329763:346680615:359500291:2569237937:2569237794:226438082:39599016:359500293:39599020:262205143:346680619:194718431:121452:21779:161344745:874510007:188011167:187937727:570441545:874510009:110341802:164457873:21751
		91	VPGLEKPW	28.65	924.507	8	56480740:17425196:322422042:17425194:336092107:85815954:108885285:17425192:336092053:336092105:56480735:56480733:162414846:85815956:260594504:164470674
		92	SQPQPFRPQQPYPQPQPQ	28.61	2147.05	18	154268814:79013966:154268822:154268810:1256791
		93	SQQQQPVLPQQQPVII	28.53	1830	16	17425196:322422042:17425194:336092107:85815954:108885285:17425192:336092053:336092105:56480735:56480733:162414846:85815956:260594504:164470674
		94	LQPQNPSQQQPQEQVPL	28.38	1957.99	17	7209265:90101520:21673:2123921189:74026515:902376029:2123921187:74026517:154268814:79013966:154268822:421932488:2123921184:147883560:601292788:7209255:421932498:147883554:1258169877:1389815507:383210741:383210739:1389814898:1258169876:1894615065:1258169881:1389817894:1389817296:383210742:1389816679:383210745:1258169879:1258169880:154268810:1256791
		95	FQPSQQNPQAQG	28.28	1328.61	12	7209265:90101520:21673:2123921189:74026515:902376029:2123921187:170712:154268814:421932488:2123921184:601292788:1258169877:1389815507:383210741:383210739:1389814898:1258169876:1894615065:1258169881:1389817894:1389817296:383210742:1389816679:383210745:1258169879:1258169880:513129839:401787282:21765:170718
		96	QLVQGQGIIQPQQPA	28.25	1603.87	15	209971851:555948556:2123576886:1282796723:260401168:555948554:478683581:2123576888:1894510589:209971853:1389710910:1894510590:1389713935:555948542:1282796722:421932703:478683579:555948540:555948562:209971885:209971883:209971857:209971911:379319139:379319145:379319143:194718421:379319141:209971909:513129969:15148387:478683569:209971843:209971877
		97	LQLQPFPQPQLPY	28.16	1567.84	13	7209265:90101520:21673:2123921189:74026515:902376029:2123921187:74026517:170712:154268814:79013966:154268822:154268810:1256791:7209261
		98	LQFPQQPEQIIPQQPQQPF	28.01	2290.17	19	208605344:1282798551:1389714864:1863295324:513130101:1245682573
		99	LQLQPFPQPQLPYPQPQLPYPQPQLPYPQPQP	27.94	3761.96	32	7209265:90101520:21673
		100	VQQQQFPGQQQPFPPQQPYPQPQPFPSQQPY	27.91	3663.75	31	7209265:90101520:21673:2123921189:74026515:902376029:2123921187:147883554:807780726
		101	LQLQPFPQPQLP	27.88	1404.78	12	7209265:90101520:21673:2123921189:74026515:902376029:2123921187:74026517:170712:154268814:79013966:154268822:154268810:1256791:7209261
		102	MQLQPFPQPQLPYPQPQLPYPQPQP	27.8	2956.49	25	2123921184
		103	SYQQPQQQYPSGQG	27.68	1594.7	14	1258169877:1389815507:383210741:383210739:1389814898:1258169876:1894615065:1258169881:1389817894:1389817296:383210742:1389816679:383210745:1258169879:1258169880
		104	LGQQQQQFPGQQQPFPPQQPYPQPQPF	27.66	3162.53	27	1258169877:1389815507:383210741:383210739:1389814898:1258169876:1894615065:1258169881:1389817894:1389817296:383210742:1389816679:383210745:1258169879:1258169880
		105	SQQPQQIFPQPQQTFPHQPQQAFPQPQ	27.54	3184.55	27	15148387:478683569:478683585
		106	PQQPPFSQQQQQPILPQQPPFSQQQQPV	27.5	3252.63	28	51870700:44885908:169666935:169666933:169666941:169666937:169666929
		107	QSGQGQQGYYPTSPQ	27.36	1624.71	15	226223:2569237885:22090:2569237814:584090046:110341796:2123603159:557367908:14329763:346680615:359500291:2569237937:2569237794:162415987:21749:110341797:570441545:345846576:21743:110341791:170743:662357279:296280726:736319:478428127:399933061:26515125:61966513:194077448:146261040
		108	LQPFPQPQLPYPQPQLPYPQPQPF	27.24	2844.46	24	2123921189:2123921184
		109	LQPHQIAQLEVMTSIALR	27.16	2047.12	18	163860188:164470666:17425212:85815962:9967353:39923010:1860560341:85815960:39923100:21773:85815958:123204244:17425188:85815966:85815964:164470654:44885910:169666925:56480740:407907621:407907619:78059071:89357853:51870700:44885908:169666935:169666933:169666941:169666937:169666929:215402078:41745895:227344088
		110	LQLQPFPQPQ	27.12	1194.64	10	7209265:90101520:21673:2123921189:74026515:902376029:2123921187:74026517:170712:154268814:79013966:154268822:421932488:147883560:601292788:7209255:421932498:147883554:513129839:807780726:154268810:1256791:401787282:7209261:513129818:1256786:401787290:807780656:21765:170718
		111	QIIPQQPQQPFPL	27.04	1532.84	13	508732623:1389715110:1282798550:1863295322:1389715540:1282798552:1245682573:229610232:229610226:229610234:229610228:224747067
		112	SQQQLPPFSQQQSPF	26.99	1745.84	15	407907621:407907619
		113	LQLQPFPQPQLPYPQPQP	26.93	2115.12	18	74026515:74026517:170712
		114	YQQPQHTFPQPQQTFPHQPQ	26.91	2461.16	20	555948556:2123576886:1282796723:260401168:555948554:478683581:2123576888:1894510589:209971853:1389710910:1894510590:1389713935:555948542:1282796722:421932703:478683579:555948540:555948562:209971885
		115	QQFPQPQQPQQSIPQQQQPL	26.75	2372.19	20	440222343:440222345
		116	LASQQQPAQGQQGHYPA	26.69	1807.86	17	226438082:39599016:359500293:39599020:262205143:346680619:194718431:121452:21779:161344745:874510007:188011167:187937727:874510009
		117	SQQPQQTFPQPQQTFPHQPQQQVPQPQQPQQPF	26.6	3906.88	33	513129937:513129955:15148398:513129957:421932705:327178025:34329283
		118	SQQQQVGQGSLVQGQGIIQPQQPA	26.41	2503.28	24	513129937:513129955:15148398:513129957:421932705:327178025:34329283:209971869:205363294
		119	SQVQWPQQQPVPQPH	26.39	1782.88	15	209971851:209971843:205363286
		120	SFPLQPQQPFPQQPQQPFPQPQLPFPQ	26.35	3170.6	27	508732623:1389715110:1282798550:1863295322:1389715540:1282798552
		121	EQSYPQQPYPS	26.22	1322.58	11	229610232:229610226:229610234:229610228
		122	TQQPQQPFPQFQQPHQPFPQPQ	26.23	2657.28	22	2123593972:478683577:1389711682:1282797655:513129959
		123	FSQQQQLFPQQPS	26.07	1561.75	13	163860188:164470666:17425212:85815962:17425182
		124	DVVLQQPNIA	25.8	1095.59	10	1258169877:1389815507:383210741:383210739:1389814898:1258169876:1894615065:1258169881:1389817894:1389817296:383210742:1389816679:383210745:1258169879:1258169880
		125	GSFQPSQQNPQAQGSVQPQ	25.66	2011.93	19	7209265:90101520:21673:2123921189:902376029:2123921187:154268814:2123921184:513129839:401787282:21765:170718
		126	SLQQPGQGQQIGQGQQGYYPT	25.63	2262.07	21	226223:2569237885:22090:2569237814:584090046:110341796:2123603159:557367908:14329763:346680615:359500291:2569237937:2569237794:226438082:39599016:359500293:39599020:262205143:346680619:194718431:121452:21779:161344745:874510007:188011167:187937727:570441545
		127	TQQSFPLQPQQPFPQQPQQPFPQPQ	25.62	2945.45	25	508732623:1389715110:1282798550:1863295322:1389715540:1282798552:208605344:1282798551:1389714864:1863295324:513130101:1245682573
		128	LPYPQPQLPYPQPQPF	25.6	1908.98	16	7209265:90101520:21673:2123921189:2123921184:401787282
		129	SQQPQQPFPQQPHQPQQPYPQQQPY	25.42	3028.42	25	508732623:1389715110:1282798550:1863295322:1389715540:1282798552:208605344:1282798551:1389714864:1863295324:513130101:1245682573
		130	SLQQPGQGQQLGQGQPGYYPT	25.14	2231.06	21	162415987:21749:110341797
		131	VQWPQQQPF	25.1	1156.57	9	209971869:555948556:2123576886:1282796723:260401168:555948554:478683581:2123576888:1894510589:209971853:1389710910:1894510590:1389713935:555948542:1282796722:421932703:478683579:555948540:555948562:209971885:209971883:209971857:209971911:379319139:379319145:379319143:194718421:379319141:209971909:513129969:209971889:209971877:1063270:34329281:34329279
		132	SLQQPGQGQQGH	25.05	1263.6	12	226223:2569237885:22090:2569237814:584090046:110341796:2123603159:557367908:14329763:346680615:359500291:2569237937:2569237794:226438082:39599016:359500293:39599020:262205143:346680619:194718431:121452:21779:161344745:874510007:188011167:187937727:570441545:874510009:1090936466:110341802:164457873:21751:1092945066
		133	LVQGQGIIQPQQPA	24.96	1475.81	14	513129937:513129955:15148398:513129957:421932705:327178025:34329283:209971869:205363294:209971851:555948556:2123576886:1282796723:260401168:555948554:478683581:2123576888:1894510589:209971853:1389710910:1894510590:1389713935:555948542:1282796722:421932703:478683579:555948540:555948562:209971885:209971883:209971857:209971911:379319139:379319145:379319143:194718421:379319141:209971909:513129969:513…
		134	VPVPQLQPQNPSQQQPQ	24.82	1911.98	17	7209265:90101520:21673:2123921189:74026515:902376029:2123921187:74026517:154268814:79013966:154268822:421932488:2123921184:147883560:601292788:7209255:421932498:147883554:1258169877:1389815507:383210741:383210739:1389814898:1258169876:1894615065:1258169881:1389817894:1389817296:383210742:1389816679:383210745:1258169879:1258169880:513129839:807780726
		135	QQVPQPQQPQQPF	24.62	1548.77	13	513129937:513129955:15148398:513129957:421932705:327178025:34329283:2123593972:478683577:1389711682:1282797655:513129959:513129914
		136	VQGQGIIQPQQPA	24.37	1362.73	13	513129937:513129955:15148398:513129957:421932705:327178025:34329283:209971869:205363294:209971851:555948556:2123576886:1282796723:260401168:555948554:478683581:2123576888:1894510589:209971853:1389710910:1894510590:1389713935:555948542:1282796722:421932703:478683579:555948540:555948562:209971885:209971883:209971857:209971911:379319139:379319145:379319143:194718421:379319141:209971909:513129969:513…
		137	FSQQQQQQLFPQQPS	24.24	1817.87	15	9967353:39923010:1860560341:85815960:39923100:21773:85815958:123204244:9967351
		138	YYPTSPQQPGQEQQPR	24.07	1902.89	16	345846576:21743:110341791:170743
		139	SQQQQLFPQQPS	24.05	1414.68	12	163860188:164470666:17425212:85815962:17425182
		140	VRVPVPQLQPQNPSQQQPQEQVPL	24.04	2733.46	24	7209265:90101520:21673:2123921189:74026515:902376029:2123921187:74026517:154268814:79013966:154268822:421932488:2123921184:147883560:601292788:7209255:421932498:147883554:1258169877:1389815507:383210741:383210739:1389814898:1258169876:1894615065:1258169881:1389817894:1389817296:383210742:1389816679:383210745:1258169879:1258169880
		141	RQLNPSEQELQSPQQPVPK	24.01	2202.14	19	229610232:229610226:229610234:229610228
		142	FLQPQQPQQSFPQQQQPL	23.96	2166.09	18	209971851:209971883
		143	VGHPEWEFPR	23.9	1252.6	10	1894630985:2123835923:1894595286:1894630983:1894630986:2123817554:1894630982:1894630984
		144	SQQQQLGQGTLVQGQGIIQPQ	23.73	2235.16	21	2123593972:478683577:1389711682:1282797655:513129959
		145	TQQPQQPFPQLQQPQQPFPQPQ	23.63	2614.29	22	513129937:513129955:15148398:513129957:421932705:327178025:34329283:205363294:513129914
		146	TQQPQQPFPQQPQQPFPQ	23.58	2148.04	18	513129937:513129955:15148398:513129957:421932705:327178025:34329283:2123593972:478683577:1389711682:1282797655:513129959:513129914
		147	LQLQPFPQPQLPYPQPQLPYPQPQ	23.57	2841.49	24	7209265:90101520:21673:2123921189
		148	QLQPFPQPQLPYPQPHLPYPQPQPF	23.46	2981.52	25	902376029:2123921187
		149	VQQQIPVVQPS	23.2	1221.67	11	163860188:164470666:17425212:85815962:9967353:39923010:1860560341:85815960:39923100:21773:85815958:123204244:78059071:89357853:17425182
		150	ASIVVGIGGQ	22.93	899.508	10	209971851:209971909:209971889:209971877
		151	VQPQQLPQFEEI	22.88	1454.74	12	7209265:90101520:21673:2123921189:902376029:2123921187:74026517:154268814:79013966:154268822:2123921184:147883560:7209255:421932498:1258169877:1389815507:383210741:383210739:1389814898:1258169876:1894615065:1258169881:1389817894:1389817296:383210742:1389816679:383210745:1258169879:1258169880:513129839:807780726:154268810:1256791:401787282:7209261:513129818
		152	SQQQPPFWQQQPPFSQQQPI	22.81	2423.17	20	163860188:164470666:17425212:85815962:9967353:39923010:1860560341:85815960:39923100:21773:85815958:123204244:9967351
		153	LSGQGQRPGQ	22.71	1026.52	10	662357279:296280726:736319:478428127:399933061:26515125:61966513:194077448
		154	LQPGQGQQGYYPT	22.7	1435.67	13	162415987:21749:110341797:662357279:296280726:736319:478428127:399933061:26515125:61966513:194077448
		155	RPQQPYPQSQPQYSQPQQPI	22.47	2394.17	20	7209265:90101520:21673
		156	RVPVPQLQPKNPSQQQPQEQVPL	22.4	2634.42	23	1256786:401787290:21765:170718
		157	RPQQPYPQSQPQ	22.39	1452.71	12	7209265:90101520:21673
		158	SQQQPPFWQQQPPFSQQQPILPQQPPFSQQ	22.32	3573.74	30	163860188:164470666:17425212:85815962:9967353:39923010:1860560341:85815960:39923100:21773:85815958:123204244:9967351
		159	SQQPQQAFPQPQ	22.29	1382.66	12	2123593972:478683577:1389711682:1282797655:513129959:513129914
		160	SRVPGLEKPW	22.15	1167.64	10	56480740:17425196:322422042:17425194:336092107:85815954:108885285:17425192:336092053:336092105:56480735:56480733:162414846:85815956:260594504:164470674
		161	SQQPQQTFPQPQ	22.14	1412.67	12	513129937:513129955:15148398:513129957:421932705:327178025:34329283:205363294:209971851:1063270:205363286
		162	LQLQPFPQPQLPYPQPHLPYPQPQPF	22.12	3094.61	26	902376029:2123921187
		163	PILPQQPPFSQQQQPQ	21.98	1859.95	16	17425164:92429653
		164	SHIPGLERPSQQQPLPPQQT	21.9	2237.16	20	164470654:44885910:169666925:407907621:407907619:51870700:44885908:169666935:169666933:169666941:169666937:169666929:17425182
		165	SQQPQQIFPQPQ	21.85	1424.7	12	209971883:209971911:15148387:478683569:209971877:78059071:478683585:34329281:34329279
		166	SQQPQQLFPQPQ	21.85	1424.7	12	440222343:440222345
		167	LVLPQQQIPF	21.72	1181.68	10	164470654:44885910:169666925:56480740:407907621:407907619
		168	VRVPVPQLQPKNPSQQQPQ	21.58	2167.19	19	1256786:401787290:21765:170718
		169	QQSGQGQQGYYPISPQ	21.5	1764.81	16	345846576:21743:110341791:170743
		170	FLQPQQPFPQQPQQPYPQQPQQPFPQ	21.33	3145.54	26	205363294:209971851
		171	LQPFPSQQPY	21.13	1203.59	10	2123921184:421932498:154268810:1256791
		172	VQQPATQLPI	21.09	1093.61	10	226223:2569237885:22090:2569237814:584090046:110341796:2123603159:557367908:14329763:346680615:359500291:2569237937:2569237794:570441545:1090936466
		173	VQGQGIIQPQQPAQ	21.08	1490.78	14	513129937:513129955:15148398:513129957:421932705:327178025:34329283:209971869:205363294:209971851:555948556:2123576886:1282796723:260401168:555948554:478683581:2123576888:1894510589:209971853:1389710910:1894510590:1389713935:555948542:1282796722:421932703:478683579:555948540:555948562:209971885:209971883:209971857:209971911:379319139:379319145:379319143:194718421:379319141:209971909:513129969:513…
		174	VLPQQPPFSQQQQPVLPPQQSPFPQ	21.07	2839.47	25	163860188:164470666:17425212:85815962:9967353:39923010:1860560341:85815960:39923100:21773:85815958:123204244:78059071:17425182
		175	LQQPPFSQQQQPV	20.98	1523.77	13	17425196:322422042:17425194:336092107:85815954:108885285:17425192:336092053:336092105:56480735:56480733:162414846:85815956:260594504:164470674
		176	SSQQSGQGHQSGQGQQGYYPT	20.91	2208.94	21	162415987:21749:110341797
		177	VQQQQFPGQQQPFPPQQPYPQPQPFPS	20.87	3147.52	27	7209265:90101520:21673:2123921189:74026515:902376029:2123921187:147883554:807780726
		178	QLPQFEEIRN	20.83	1272.65	10	7209265:90101520:21673:2123921189:902376029:2123921187:74026517:170712:154268814:79013966:154268822:421932488:2123921184:147883560:7209255:421932498:1258169877:1389815507:383210741:383210739:1389814898:1258169876:1894615065:1258169881:1389817894:1389817296:383210742:1389816679:383210745:1258169879:1258169880:513129839:807780726:154268810:1256791:401787282:7209261:513129818
		179	YQQPQQTFPQPQ	20.82	1488.7	12	513129969
		180	LQPQQAFPQQPQQPFPQ	20.79	2006	17	2123593972:478683577:1389711682:1282797655:513129959:513129914
		181	NMQVDPSGQVQWPQQQLVPQPQQPL	20.77	2869.42	25	2123593972:478683577:1389711682:1282797655:513129959:513129914
		182	VRVPVPQLQPQNPSQQHPQEQVPL	20.76	2742.46	24	7209261
		183	SLWQPGQGQQG	20.73	1184.56	11	162415987:21749:110341797
		184	LQPQQPFPQQPQQPYPQQPQQPFPQ	20.34	2998.47	25	205363294:209971851
		185	SQQPFPLQPQQPF	20.24	1540.77	13	229610232:229610226:229610234:229610228
		186	QLQPFPQPQLP	20.21	1291.69	11	7209265:90101520:21673:2123921189:74026515:902376029:2123921187:74026517:170712:154268814:79013966:154268822:2123921184:154268810:1256791:7209261
	WG-SP	1	SHQQQPFPQQPYPQQPYPS	48.7	2281.06	19	513130099:508732623:1389715110:1282798550:1863295322:1389715540:1282798552:1245682573:1863295309:1245682565:555948505:208605344:1282798551:1389714864:1863295324:513130101:1894521588:1894521627:555948515:555948509:555948503:555948513:1245682579:555948507:513130097:555948511:1245682587
		2	LPQLPYPQPQPFPPQQSYPQPQPQYPQPQQPI	47.86	3750.88	32	1258169877:1389815507:383210741:383210739:1389814898:1258169876:1894615065:1258169881:1389817894:1389817296:383210742:1389816679:383210745:1258169879:1258169880:1894615066:1389816158:1258169878:383210743:1894615068
		3	QQLPQPQQPQQSFPQQQRPF	45.76	2434.21	20	332071050:15148398:327178025:34329283
		4	NMQVDPSGQVQWPQQQPF	45.22	2112.97	18	209971869
		5	SHQQQPFPQQPYPQQPYPSQQPYPS	44.49	2981.37	25	513130099:508732623:1389715110:1282798550:1863295322:1389715540:1282798552:1245682573:1863295309:1245682565:555948505:208605344:1282798551:1389714864:1863295324:513130101:1894521588:1894521627:555948515:555948509:555948503:555948513:1245682579:555948507:513130097:555948511:1245682587
		6	QLQPFPQPQLPYPQPQPF	44.4	2149.1	18	74026517:147883566
		7	NIQVDPSGQVQWPQQQQPFPQPQQPF	44.19	3045.47	26	15148387:478683569:15148383:78059069
		8	SHIPGLEKPSQQQPLPL	44.15	1868.02	17	336092075:336092081:385845916:385845891:385845942:336092079:85815966:336092087:485474679:85815964:336092077:336092089:164470668:336092061:17425188
		9	LGQQQPFPPQQPYPQPQPFPSQQPY	44.01	2921.41	25	74026517:154268814
		10	LQLQPFPQPQLPYPQPH	42.3	2027.06	17	147883550
		11	LQPQQPQQSFPQQQQPL	42.06	2019.02	17	209971851:1624701629:209971883:2123611019:1624701575:1729914722:1624701589:1282798541:478683575:1389712465:209971875:2123611021:260401170
		12	GSFQPSQQNPQAQGSVQPQ	42	2011.93	19	154268814:7209265:147883558:90101520:147883548:21673:147883566
		13	VRVPVPQLQPQNPSQQQPQ	41.47	2167.15	19	1258169877:1389815507:383210741:383210739:1389814898:1258169876:1894615065:1258169881:1389817894:1389817296:383210742:1389816679:383210745:1258169879:1258169880:1894615066:1389816158:1258169878:383210743:1894615068:74026517:154268814:7209265:147883558:90101520:147883548:21673
		14	LQLQPFPQPQLPYPQPQLPYPQPQLPYPQPQP	41.18	3761.96	32	7209265:147883558:90101520:147883548:21673
		15	LGQQQQQFPGQQQPFPPQQPYPQPQPF	40.43	3162.53	27	1258169877:1389815507:383210741:383210739:1389814898:1258169876:1894615065:1258169881:1389817894:1389817296:383210742:1389816679:383210745:1258169879:1258169880:1894615066:1389816158:1258169878:383210743:1894615068
		16	IALPVPSQPVDPR	40.27	1387.78	13	1150017191:1905425421:1905425429:1905425419:1905425387:123957:1905425391:1894583401:1905425385:21713:1905425397:1905425431:2234200264:1905425389:1905425393:38098487:1905425423:1634548348:1894588267:2123816602
		17	SQQQQVGQGSLVQGQ	40.06	1570.77	15	332071050:15148398:327178025:34329283:209971869
		18	SQQQQIPVIHPSV	39.47	1459.78	13	215402078:254973025:41745922:41745895:110559503:254973021:254973023:227344088:41745908:17425218:254973047:17425216:17425214:227344094:227344092:56480898:56480894:41745953:56480904:45477535:56480900:164470652:56480902:41745978:108885291:227344090:41745937:1857660:9967355:56480896
		19	LISQQPFPLQPQQPF	39.08	1766.94	15	229610232
		20	IISQQPFPLQPQQPF	39.08	1766.94	15	225625626:229610226:229610234:229610228:224747071:229610238:2295816940:229610230
		21	GGSFYPGETTPPQQ	38.95	1464.65	14	736319:2123620157:61966513:21743:915195093:1092945068
		22	SQQQQPPFSQQQPPFSQQQQPVLPQQPS	38.2	3216.56	28	336092075:336092081:385845891:336092079:336092087:485474679:85815964:336092077:336092089:336092061
		23	SQQQQPPFSQQQPPFSQQQQPVIPQQPS	38.2	3216.56	28	385845916:385845942:85815966:164470668:17425188
		24	NIQVDPSGQVQWPQQQPFPQPQPF	37.13	2789.36	24	379319147:379319145:379319139:379319143:194718421:372292210:379319141:194718423
		25	SFQQPQQQYPSGQG	36.2	1578.71	14	7209265:147883558:90101520:147883548:21673:147883566
		26	SYQQPQQQYPSGQG	35.73	1594.7	14	1258169877:1389815507:383210741:383210739:1389814898:1258169876:1894615065:1258169881:1389817894:1389817296:383210742:1389816679:383210745:1258169879:1258169880:1389816158:1258169878:383210743
		27	TQQSFPLQPQQPFPQQPQQPFPQPQ	35.63	2945.45	25	513130099:508732623:1389715110:1282798550:1863295322:1389715540:1282798552:1245682573:1863295309:1245682565:555948505:208605344:1282798551:1389714864:1863295324:513130101:1894521588:1894521627:555948515:555948509:555948503
		28	QLQPFPQPQLPYPQPQLPYPQPQLPYPQPQPF	35.24	3795.95	32	7209265:147883558:90101520:147883548:21673
		29	FQPSQQNPQAQG	34.8	1328.61	12	1258169877:1389815507:383210741:383210739:1389814898:1258169876:1894615065:1258169881:1389817894:1389817296:383210742:1389816679:383210745:1258169879:1258169880:1894615066:1389816158:1258169878:383210743:154268814:7209265:147883558:90101520:147883548:21673:147883566:147883550
		30	VQQQQFPGQQQPFPPQQPYPQPQPFPSQQPY	34.47	3663.75	31	7209265:147883558:90101520:147883548:21673
		31	PQLPYPQPQPFPPQQSYPQPQPQYPQPQQPI	34.46	3637.8	31	1258169877:1389815507:383210741:383210739:1389814898:1258169876:1894615065:1258169881:1389817894:1389817296:383210742:1389816679:383210745:1258169879:1258169880:1894615066:1389816158:1258169878:383210743:1894615068
		32	QSFPLQPQQPFPQQPQQPFPQPQLPFPQ	34.21	3298.66	28	513130099:508732623:1389715110:1282798550:1863295322:1389715540:1282798552:1863295309:1245682565:555948505:1894521588:1894521627
		33	SQPQPFRPQQPYPQPQPQ	34.2	2147.05	18	154268814
		34	SLQQSGQGQPGYYPT	34.18	1609.74	15	736319:2123620157:61966513:1092945068
		35	LQLQPFPQPQLP	34.02	1404.78	12	74026517:154268814:7209265:147883558:90101520:147883548:21673:147883566:147883550
		36	SQQQQVGQGSLVQGQGIIQPQQPA	34	2503.28	24	332071050:15148398:327178025:34329283:209971869
		37	YYPTSPQQPGQEQQPR	33.8	1902.89	16	21743:915195093
		38	QPQLPYPQPQLPYPQPQPF	33.74	2262.15	19	7209265:147883558:90101520:147883548:21673
		39	LQPHQIAQLEVMTSIALR	33.45	2047.12	18	336092075:336092081:385845916:385845891:385845942:336092079:85815966:336092087:485474679:85815964:336092077:336092089:164470668:336092061:17425188:215402078:254973025:41745922:41745895:110559503:254973021:254973023:227344088:41745908:17425214:227344094:227344092:56480898:56480894:41745953:56480904:45477535:56480900:164470652:56480902:41745978
		40	LQLQPFPQPQLPYPQPQP	33.24	2115.12	18	74026517:147883566
		41	LQPGQGQQGYYPT	33.08	1435.67	13	736319:2123620157:61966513:1092945068
		42	LQPQNPSQQQPQEQVPL	33.02	1957.99	17	1258169877:1389815507:383210741:383210739:1389814898:1258169876:1894615065:1258169881:1389817894:1389817296:383210742:1389816679:383210745:1258169879:1258169880:1894615066:1389816158:1258169878:383210743:1894615068:74026517:154268814:7209265:147883558:90101520:147883548:21673
		43	NIQVDPSGQVQ	32.5	1183.58	11	332071050:15148398:327178025:15148387:478683569:15148383:78059069:379319147:379319145:379319139:379319143:194718421:372292210:379319141:194718423
		44	SQRPQQPFPLQPQQPF	32.42	1921.98	16	229610232:225625626:229610226:229610234:229610228:224747071
		45	SFQQPQQQYPSGQ	32.42	1521.68	13	7209265:147883558:90101520:147883548:21673:147883566
		46	LQLQPFPQPQLPYPQPQPF	32.27	2262.18	19	74026517:147883566
		47	SLQQPGQGQQPGQ	31.88	1351.65	13	736319:2123620157:61966513:1092945068
		48	QLGQGQQGYYPT	31.63	1338.62	12	736319:2123620157:61966513:21743:915195093:1092945068
		49	EQSYPQQPYPS	31.47	1322.58	11	229610232:225625626:229610226:229610234:229610228:224747071:229610238:2295816940:229610230
		50	AQGTFLQPHQIAQLEVMTSIALR	30.77	2551.36	23	336092075:336092081:385845916:385845891:385845942:336092079:85815966:336092087:485474679:85815964:336092077:336092089:164470668:336092061:17425188
		51	SSLQPEQGQQGYYPT	30.58	1681.76	15	21743:915195093
		52	SQQPQQTFPQPQQTFPHQPQQQVPQPQQPQQPF	30.25	3906.88	33	15148398:327178025:34329283
		53	NMQVDPSGQVQWPQQQPFPQPQQPF	30.13	2935.37	25	209971869
		54	SQQPQQPFPQQPHQPQQPYPQQQPY	30.04	3028.42	25	513130099:508732623:1389715110:1282798550:1863295322:1389715540:1282798552:1245682573:1863295309:208605344:1282798551:1389714864:1863295324:513130101:555948513:1245682579:555948507:555948511
		55	LQLQPFPQPQLPYPQPQLPYPQPQ	30.01	2841.49	24	7209265:147883558:90101520:147883548:21673
		56	VRVPVPQLQPQNPSQQQPQEQVPL	29.91	2733.46	24	1258169877:1389815507:383210741:383210739:1389814898:1258169876:1894615065:1258169881:1389817894:1389817296:383210742:1389816679:383210745:1258169879:1258169880:1894615066:1389816158:1258169878:383210743:1894615068:74026517:154268814:7209265:147883558:90101520:147883548:21673
		57	TQQSFPLQPQQPFPQQPQQPFPQPQLPFPQ	29.84	3527.76	30	513130099:508732623:1389715110:1282798550:1863295322:1389715540:1282798552:1863295309:1245682565:555948505:1894521588:1894521627
		58	PILPQQPPFSQQQQQP	29.74	1859.95	16	336092075:336092081:385845916:385845891:385845942:336092079:85815966:336092087:485474679:85815964:336092077:336092089:164470668
		59	LQLQPFPQPQLPYPQPHLPYPQPQP	29.38	2947.54	25	147883550
		60	SQQPQQIFPQPQ	29.33	1424.7	12	15148387:478683569:15148383:78059069:209971883
		61	TQQPQQPFPQLQQPQQPFPQPQ	28.54	2614.29	22	332071050:15148398:327178025:34329283
		62	RPQQPYPQPQPQYSQPQQPI	28.54	2404.19	20	74026517:154268814:147883566:147883550
		63	VQWPQQQPFPQPQQPF	27.09	1978.97	16	209971869
		64	LGQQQPFPPQQPYPQPQPFPS	26.48	2405.18	21	74026517:154268814
		65	QQVPQPQQPQQPF	26.32	1548.77	13	332071050:15148398:327178025:34329283
		66	QQYPLGQGSFRPSQQNPQAQGSVQPQ	26.19	2854.37	26	74026517
		67	FLQPQQPFPQQPQQPYPQQPQQPFPQ	26.15	3145.54	26	209971851
		68	LQFPQQPEQIIPQQPQQPF	26.14	2290.17	19	1245682573:208605344:1282798551:1389714864:1863295324:513130101:555948515:555948509:555948503
		69	SQQPPISQQQQQQQQQQQPF	25.84	2408.15	20	215402078:254973025:41745922:41745895:110559503:254973021:254973023:227344088:41745908:17425218:254973047:17425216
		70	SQQPQQIFPQPQQTFPHQPQ	25.58	2388.16	20	15148387:478683569:15148383:209971883
		71	QLQPFPQPQLP	25.16	1291.69	11	74026517:154268814:7209265:147883558:90101520:147883548:21673:147883566:147883550
		72	VQPQQLPQFEEI	24.75	1454.74	12	1258169877:1389815507:383210741:383210739:1389814898:1258169876:1894615065:1258169881:1389817894:1389817296:383210742:1389816679:383210745:1258169879:1258169880:1894615066:74026517:154268814:7209265:147883558:90101520:147883548:21673:147883566:147883550
		73	QSGQGQPGYYPTSPQ	24.62	1593.71	15	21743:915195093
		74	DVVLQQPNIA	24.54	1095.59	10	1258169877:1389815507:383210741:383210739:1389814898:1258169876:1894615065:1258169881:1389817894:1389817296:383210742:1389816679:383210745:1258169879:1258169880:1894615066:1389816158:1258169878:383210743:1894615068
		75	ASIVVGIGGQ	24.29	899.508	10	209971851:1624701629:2123611019:1624701575:1729914722:1624701589:1282798541:478683575:1389712465:209971875:2123611021
		76	LQPGQGQQGYYPTSPQ	23.81	1747.82	16	736319:2123620157:61966513:1092945068
		77	QSGQGQQGYYPTSPQ	23.67	1624.71	15	736319:2123620157:61966513:21743:915195093
		78	LQPQQPFPQQPQQPYPQQPQQPFPQ	23.45	2998.47	25	209971851
		79	RPQQPYPQPQPQ	23.03	1462.73	12	74026517:154268814:147883566:147883550
		80	SFRPSQQNPQAQGSVQPQ	23	1982.96	18	74026517
		81	VQGQGIIQPQQPA	22.97	1362.73	13	332071050:15148398:327178025:34329283:209971869:15148387:478683569:209971851:1624701629:209971883:2123611019:1624701575:1729914722:1624701589:1282798541:478683575:1389712465:209971875:2123611021:260401170:379319147:379319145:379319139:379319143:194718421:372292210:379319141:194718423
		82	VPVPQLQPQNPSQQQPQEQVPL	22.9	2478.29	22	1258169877:1389815507:383210741:383210739:1389814898:1258169876:1894615065:1258169881:1389817894:1389817296:383210742:1389816679:383210745:1258169879:1258169880:1894615066:1389816158:1258169878:383210743:1894615068:74026517:154268814:7209265:147883558:90101520:147883548:21673
		83	QPLPQPQQPQQPF	22.84	1531.78	13	15148387:478683569:15148383
		84	LQLQPFPQPQLPY	22.83	1567.84	13	74026517:154268814:7209265:147883558:90101520:147883548:21673:147883566:147883550
		85	SQQPQQTFPQPQ	22.82	1412.67	12	332071050:15148398:327178025:34329283:209971851:1624701629
		86	QIIPQQPQQPFPL	22.67	1532.84	13	513130099:508732623:1389715110:1282798550:1863295322:1389715540:1282798552:1245682573:1245682565:555948505:229610232:225625626:229610226:229610234:229610228:224747071:229610238:2295816940:229610230
		87	RPQQPYPQSQPQ	22.63	1452.71	12	7209265:147883558:90101520:147883548:21673
		88	LSGQGQRPGQ	22.3	1026.52	10	736319:2123620157:61966513
		89	VQGQGIIQPQQPAQ	22.19	1490.78	14	332071050:15148398:327178025:34329283:209971869:15148387:478683569:209971851:1624701629:209971883:2123611019:1624701575:1729914722:1624701589:1282798541:478683575:1389712465:209971875:2123611021:260401170:379319147:379319145:379319139:379319143:194718421:372292210:379319141:194718423
		90	IISQRPQQPFPL	22.06	1422.8	12	229610232:225625626:229610226:229610234:229610228:224747071:229610238:2295816940:229610230
		91	LQLQPFPQPQ	22	1194.64	10	74026517:154268814:7209265:147883558:90101520:147883548:21673:147883566:147883550
		92	SFPLQPQQPFPQQPQQPFPQPQLPFPQ	21.99	3170.6	27	513130099:508732623:1389715110:1282798550:1863295322:1389715540:1282798552:1863295309:1245682565:555948505:1894521588:1894521627
		93	QLQPFPQPQLPYPQPHLPYPQPQPF	21.62	2981.52	25	147883550
		94	QLPQFEEIRN	21.61	1272.65	10	1258169877:1389815507:383210741:383210739:1389814898:1258169876:1894615065:1258169881:1389817894:1389817296:383210742:1389816679:383210745:1258169879:1258169880:1894615066:74026517:154268814:7209265:147883558:90101520:147883548:21673:147883566:147883550
		95	SQQPFPLQPQQPF	21.55	1540.77	13	229610232:225625626:229610226:229610234:229610228:224747071:229610238:2295816940:229610230
		96	LQLQPFPQPQLPYPQPQLPYPQPQLPYPQPQPF	21.46	3909.03	33	7209265:147883558:90101520:147883548:21673
		97	LPYPQPQLPYPQPQLPYPQPQPF	21.45	2732.4	23	7209265:147883558:90101520:147883548:21673
		98	SQQPQQPFPQQPHQPQQPYPQ	21.31	2512.19	21	513130099:508732623:1389715110:1282798550:1863295322:1389715540:1282798552:1245682573:1863295309:208605344:1282798551:1389714864:1863295324:513130101:555948513:1245682579:555948507:513130097:555948511
		99	VQWPQQQPF	20.87	1156.57	9	209971869:209971883:379319147:379319145:379319139:379319143:194718421:372292210:379319141:194718423
		100	LPYPQPQLPYPQPQPF	20.47	1908.98	16	7209265:147883558:90101520:147883548:21673
	WG-SP-LC/AA	1	LQPQQPQQSFPQQQQPL	51.97	2019.02	17	209971851:209971883
		2	YYPTSPQQPGQEQQPR	48.99	1902.89	16	21743
		3	NMQVDPSGQVQWPQQQPF	48.83	2112.97	18	260401168:209971853:421932703:209971885:209971907:209971869:209971899:209971857:209971873
		4	SHQQQPFPQQPYPQQPYPSQQPYPS	46.78	2981.37	25	508732623:513130099:208605344:513130101
		5	YSSSLQQPGQGLQGHYPA	46.36	1916.9	18	2569237914:226223:2569237885:22090:2569237855:2569237814:584090046:110341796:2123603159:557367908:14329763:346680615:359500291:2569237937:2569237794:1090936466
		6	SQQPQQTFPQPQQTFPHQPQQQVPQPQQPQQPF	45.78	3906.88	33	170738:15148398
		7	SHQQQPFPQQPYPQQPYPS	45.69	2281.06	19	508732623:513130099:208605344:513130101
		8	SLQQPGQGQQQGQGQQGYYPT	45.42	2277.04	21	21779
		9	VRVPVPQLQPQNPSQQQPQ	44.82	2167.15	19	7209265:90101520:21673:902375991:74026515:74026517:154268814:807780718:807780716:1389816158:1258169878:383210743:1258169877:1389815507:383210741:383210739:1389814898:1258169876:1894615065:1258169881:1389817894:1389817296:383210742:1389816679:383210745:1258169879:1258169880:807780680:154268816:79013968:154268812:154268826:170724:807780664:807780682:601292788:147883554:147883560:421932488:513129839…
		10	SSQQGSYYPGQASPQ	44.3	1583.69	15	1512470134:1092945066
		11	QLQPFPQPQLPYPQPQLPYPQPQLPYPQPQPF	44.23	3795.95	32	7209265:90101520:21673:902375991
		12	LQLQPFPQPQPFPPQLPYPQPQ	43.61	2584.35	22	601292788:147883554:147883560:513129839:401787282:807780656
		13	LPQLPYPQPQPFPPQQSYPQPQPQYPQPQQPI	42.72	3750.88	32	1389816158:1258169878:383210743:1258169877:1389815507:383210741:383210739:1389814898:1258169876:1894615065:1258169881:1389817894:1389817296:383210742:1389816679:383210745:1258169879:1258169880
		14	SHIPGLEKPSQQQPLPL	42.16	1868.02	17	17425188:485474764:485474904:485474762:485475191:485475130:485474739:485474677:485475262:485475078:485475055:485474980:485474820:385845888:485475103:485475355:217426768:336092119:485475030:485475003:164470670:17425164:485474876:385845939:485475159:385845914:485474794:485474927:485474955:92429653:485474846:485474711
		15	PQLPYPQPQPFPPQQSYPQPQPQYPQPQQPI	41.97	3637.8	31	1389816158:1258169878:383210743:1258169877:1389815507:383210741:383210739:1389814898:1258169876:1894615065:1258169881:1389817894:1389817296:383210742:1389816679:383210745:1258169879:1258169880
		16	LGQQQQQFPGQQQPFPPQQPYPQPQPF	41.66	3162.53	27	1389816158:1258169878:383210743:1258169877:1389815507:383210741:383210739:1389814898:1258169876:1894615065:1258169881:1389817894:1389817296:383210742:1389816679:383210745:1258169879:1258169880
		17	GSFQPSQQNPQAQGSVQPQ	41.51	2011.93	19	7209265:90101520:21673:154268814:79013968:154268812:154268826:170724:513129839:401787282
		18	LQLQPFPQPQLPYPQPQLPYPQPQLPYPQPQPF	40.07	3909.03	33	7209265:90101520:21673:902375991
		19	SLQQSGQGQPGYYPT	38.97	1609.74	15	736319:2562262173
		20	TQQSFPLQPQQPFPQQPQQPFPQPQ	38.86	2945.45	25	508732623:513130099:208605344:513130101
		21	SFRPSQQNPQAQGSVQPQ	38.7	1982.96	18	902375991:74026517:807780718:807780716:807780664:147883560:807780726:513129818
		22	YQPQQPFPQQPGQIIPQQPQQPSPLQPQQPF	38.52	3593.81	31	224747067:225625614
		23	QLQPFPQPQLPYPQPQPF	38.25	2149.1	18	74026515:74026517:807780718
		24	IISQQPFPLQPQQPF	38.06	1766.94	15	225625626
		25	LISQQPFPLQPQQPF	38.06	1766.94	15	229610232
		26	LQPQNPSQQQPQEQVPL	37.46	1957.99	17	7209265:90101520:21673:902375991:74026515:74026517:154268814:807780718:807780716:1389816158:1258169878:383210743:1258169877:1389815507:383210741:383210739:1389814898:1258169876:1894615065:1258169881:1389817894:1389817296:383210742:1389816679:383210745:1258169879:1258169880:807780680:154268816:601292788:147883554:147883560:421932488
		27	LQPGQGQQGYYPT	37.42	1435.67	13	1512470134:736319:2562262173
		28	PILPQQPPFSQQQQPQ	36.78	1859.95	16	485474762:485475191:485475130:485474739:485474677:485475262:485475078:485475055:485474980:485474820:385845888:485475103:485475355:217426768:336092119:485475030:485475003:164470670:17425164:485474876:385845939:485475159:385845914:485474794:485474927:485474955:92429653:485474846:485474711
		29	FQPSQQNPQAQGSFQPQ	36.71	1915.88	17	74026515:601292788:421932488
		30	IALPVPSQPVDPR	36.28	1387.78	13	1150017191:1905425421:1905425429:1905425419:1905425387:123957:1905425391:1894583401:1905425385:21713:1905425397:1905425431:2234200264:1905425389:1905425393:38098487:1905425423:1634548348:1894588267:2123816602
		31	LQLQPFPQPQLPYPQPQLPYPQPQLPYPQPQP	36.16	3761.96	32	7209265:90101520:21673:902375991
		32	VQWPQQQPVPQPH	35.5	1567.79	13	209971851:209971843
		33	SQQPQQPFPQPQQPQQSFPQQQQPL	35.17	2943.43	25	260401168:209971853:421932703:209971885:209971907:209971843
		34	NIQVDPSGQVQWPQQQQPFPQPQQPF	35.13	3045.47	26	15148387
		35	AGSFYPSETTPSQQ	35.03	1498.66	14	1512470134
		36	LGQQQPFPPQQPYPQPQPFPS	34.03	2405.18	21	74026517:154268814:807780716:807780656
		37	MQLQPFPQPQLPYPQPQLPYPQPQP	33.8	2956.49	25	79013968:154268812:154268826:170724:807780664:807780682
		38	WLQPGQGQQGYYPT	33.74	1621.75	14	1512470134:736319:2562262173
		39	QQLPQPQQPQQSFPQQQRPF	33.27	2434.21	20	170738:15148398
		40	VQWPQQQPFPQPQQPF	32.8	1978.97	16	209971907:209971869:209971899:209971857:209971873
		41	SQQQLPPFSQQQSPF	32.51	1745.84	15	513130074
		42	TQQPQQPFPQFQQPHQPFPQPQ	32.48	2657.28	22	513129959:1389711682:1282797655:2123593972:478683577
		43	NIQVDPSGQVQ	32.44	1183.58	11	170738:15148398:15148387:1063270:379319139:379319145:379319143:194718421:379319141:194718423
		44	LGQQQPFPPQQPYPQPQPFPSQQPY	32.24	2921.41	25	74026517:154268814:807780716:807780656
		45	GGSFYPGETTPPQQ	32.07	1464.65	14	736319:2562262173:1090936466:21743
		46	SQQQQQQLFPQQPS	32.05	1670.8	14	9967353:1857658:513130021:385845880:39923010:85815960:1857654:39923100:336092097:390132114:21773:85815958:223007038:123204244:390132110:223007036:336092093:383216468:390132106:376341649:376341652
		47	SFQQPQQQYPSGQ	32	1521.68	13	7209265:90101520:21673:74026515:154268816:421932488:513129818
		48	SQQQQPPFSQQQPPFSQQQQPVIPQQPS	31.9	3216.56	28	17425188:485474904
		49	SQQQQPPFSQQQPPFSQQQQPVLPQQPS	31.9	3216.56	28	485474764:513130074
		50	FQQPHQPFPQPQ	31.81	1477.71	12	513129959:1389711682:1282797655:2123593972:478683577
		51	QLQPFPQPQLPYPQPQLPYPQPQPF	31.77	2972.52	25	807780680:154268816:79013968:154268812:154268826:170724:807780664:807780682
		52	AQLPFPQQPQQPFPQPQQPQQPFPQ	31.47	2925.46	25	260401168:209971853:421932703:209971885:209971907:209971843
		53	VSFQQPQQQYPL	31.29	1461.73	12	902375991:807780718:807780716:807780680:807780664:807780726
		54	SQRPQQPFPLQPQQPF	30.64	1921.98	16	225625626:229610232:224747067
		55	SQPQPFRPQQPYPQPQPQ	30.58	2147.05	18	154268814:807780716
		56	LQLQPFPQPQPF	30.54	1438.76	12	601292788:147883554:147883560:421932488:513129839:807780726:401787282:807780656:513129818
		57	GGSFYPGETTPL	30.45	1224.57	12	2569237914:226223:2569237885:22090:2569237855:2569237814:584090046:110341796:2123603159:557367908:14329763:346680615:359500291:2569237937:2569237794:21779:570441545
		58	LQLQPFPQPQLPYPQPQPF	30.24	2262.18	19	74026515:74026517:807780718
		59	QIIPQQPQQPFPL	30.09	1532.84	13	508732623:513130099:225625626:229610232:224747067:225625614
		60	SLQQPGQGQQPGQ	29.95	1351.65	13	1512470134:736319:2562262173:570441545
		61	QSGQGQQPGQGQSGYFPTS	29.72	1937.85	19	1512470134
		62	SLQQPGQGQQGHYPA	29.66	1594.75	15	2569237914:226223:2569237885:22090:2569237855:2569237814:584090046:110341796:2123603159:557367908:14329763:346680615:359500291:2569237937:2569237794:1090936466:21779:570441545:1092945066
		63	SFPLQPQQPFPQQPQQPFPQPQLPFPQ	29.34	3170.6	27	508732623:513130099
		64	SYQQPQQQYPSGQG	29.11	1594.7	14	1389816158:1258169878:383210743:1258169877:1389815507:383210741:383210739:1389814898:1258169876:1894615065:1258169881:1389817894:1389817296:383210742:1389816679:383210745:1258169879:1258169880
		65	SLQQPGQGQQIGQGQQGYYPTSPQ	29.1	2574.21	24	2569237914:226223:2569237885:22090:2569237855:2569237814:584090046:110341796:2123603159:557367908:14329763:346680615:359500291:2569237937:2569237794:21779:570441545
		66	LESQQPFPQQPQQPFPQPQ	28.65	2248.09	19	208605344:513130101
		67	LQPHQIAQLEVMTSIALR	28.39	2047.12	18	17425188:485474764:485474904:513130074:9967353:1857658:513130021:385845880:39923010:85815960:1857654:39923100:336092097:390132114:21773:85815958:223007038:123204244:390132110:223007036:336092093:383216468:390132106:376341649:376341652:51870700:44885908:169666941:169666937:169666929:385845921:169666939:169666931:169666935:169666933:485474907:485474827:485474882:17425174:485474748:17425168:16966694…
		68	QQFPQPQQPQQSIPQQQQPL	27.97	2372.19	20	440222339
		69	LQPQQPFPQQPQQPFPQ	27.88	2032.02	17	508732623:513130099:208605344:513130101:170738:15148398
		70	IQPQQPFPQQPQQPFPQ	27.88	2032.02	17	225625626:229610232:225625614:34329281
		71	QSGQGQQPGQGQQGYYPTSPQ	27.8	2219.98	21	1512470134
		72	LVLPQQPPFSQQQQPVLPPQQSPFPQ	27.8	2952.55	26	9967353:1857658:513130021:385845880:39923010:85815960:1857654:39923100:336092097:390132114:21773:85815958:223007038:123204244:390132110:223007036:336092093:383216468:390132106:376341649:376341652
		73	IISQRPQQPFPL	27.79	1422.8	12	225625626:229610232:224747067
		74	TASLQQPGQGQQGHYPA	27.75	1766.83	17	2569237914:226223:2569237885:22090:2569237855:2569237814:584090046:110341796:2123603159:557367908:14329763:346680615:359500291:2569237937:2569237794:1090936466:570441545
		75	SQQQLPPFSQQQQPPFSQQQQPVLPQQPS	27.7	3329.64	29	51870700:44885908:169666941:169666937:169666929:385845921:169666939:169666931:169666935:169666933:485474907:485474827:485474882:17425174:485474748:17425168:169666943:485474746:17425172:17425170:123204248:17425178
		76	LPYPQPQLPYPQPQPF	27.56	1908.98	16	7209265:90101520:21673:902375991:807780680:154268816:79013968:154268812:154268826:170724:807780664:807780682:401787282
		77	LQFPQQPEQIIPQQPQQPF	27.54	2290.17	19	208605344:513130101
		78	EQSYPQQPYPS	27.28	1322.58	11	225625626:229610232:225625614
		79	YQQPQHTFPQPQ	27.18	1497.7	12	260401168:209971853:421932703:209971885
		80	LQQQIPIVHPS	27.12	1258.7	11	17425210:17425208
		81	RPQQPYPQPQPQ	27.09	1462.73	12	74026515:74026517:154268814:807780718:807780716:807780680:807780682
		82	RPQQPYPQPQPQYSQPQQPI	26.98	2404.19	20	74026515:74026517:154268814:807780718:807780716:807780680:807780682
		83	LPYPQPQLPYPQPQLPYPQPQPF	26.84	2732.4	23	7209265:90101520:21673:902375991
		84	SQQPQQPFPQQPHQPQQPYPQQQPY	26.68	3028.42	25	508732623:513130099:208605344:513130101
		85	VQGQGIIQPQQPAQ	26.61	1490.78	14	170738:15148398:260401168:209971853:421932703:209971885:209971851:209971869:209971899:209971857:209971873:209971883:209971843:513129914:15148387:1063270:379319139:379319145:379319143:194718421:379319141:194718423:205363294
		86	TQQPQQPFPQLQQPQQPFPQPQ	26.37	2614.29	22	170738:15148398:513129914:205363294
		87	VQQQQFPGQQQPFPPQQPYPQPQPFPSQQPY	25.93	3663.75	31	7209265:90101520:21673:902375991:74026515:807780718:807780680:154268816:147883554:807780726
		88	DVVLQQPNIA	25.92	1095.59	10	1389816158:1258169878:383210743:1258169877:1389815507:383210741:383210739:1389814898:1258169876:1894615065:1258169881:1389817894:1389817296:383210742:1389816679:383210745:1258169879:1258169880
		89	FLQPQQPFPQQPQQPYPQQPQQPFPQ	25.47	3145.54	26	209971851:205363294
		90	QLPGQGQQGYYPTSPQ	25.43	1747.82	16	570441545
		91	QLQPFPQPQLPYPQPQLPYPQPQLPYPQPQP	25.43	3648.88	31	7209265:90101520:21673:902375991
		92	QTFPHQPQQQVPQPQQPQQPF	25.37	2512.22	21	170738:15148398:513129959:1389711682:1282797655:2123593972:478683577:513129914
		93	QSFPLQPQQPFPQQPQQPFPQPQLPFPQ	25.32	3298.66	28	508732623:513130099
		94	SFQPSQLNPQ	25.22	1144.55	10	807780682:147883554
		95	NMQVDPSGQVQWPQQQLVPQPQQPL	25.14	2869.42	25	513129959:1389711682:1282797655:2123593972:478683577:513129914
		96	LVQGQGIIQPQQPA	24.92	1475.81	14	170738:15148398:260401168:209971853:421932703:209971885:209971851:209971869:209971899:209971857:209971873:209971883:209971843:513129914:15148387:1063270:379319139:379319145:379319143:194718421:379319141:194718423:205363294
		97	QQVPQPQQPQQPF	24.85	1548.77	13	170738:15148398:513129959:1389711682:1282797655:2123593972:478683577:513129914
		98	VPGLEKPW	24.81	924.507	8	513130074:162414846
		99	QLQPFPQPQLPYPQPQLPYPQPQP	24.78	2825.45	24	807780680:154268816:79013968:154268812:154268826:170724:807780664:807780682
		100	QQPPPFSQQQQPV	24.5	1507.74	13	162414846
		101	FQPSQQNPQAQG	24.42	1328.61	12	7209265:90101520:21673:74026515:154268814:1389816158:1258169878:383210743:1258169877:1389815507:383210741:383210739:1389814898:1258169876:1894615065:1258169881:1389817894:1389817296:383210742:1389816679:383210745:1258169879:1258169880:154268816:79013968:154268812:154268826:170724:601292788:421932488:513129839:401787282
		102	LQQPPFSQHQQPVLPQQQIPSVQPS	24.28	2835.47	25	886965
		103	SQQPQQAFPQPQ	24.23	1382.66	12	513129959:1389711682:1282797655:2123593972:478683577:513129914
		104	LQLQPFPQPQLP	24.22	1404.78	12	7209265:90101520:21673:902375991:74026515:74026517:154268814:807780718:807780716:807780680:154268816
		105	VQWPQQQPF	24.16	1156.57	9	260401168:209971853:421932703:209971885:209971907:209971869:209971899:209971857:209971873:209971883:1063270:379319139:379319145:379319143:194718421:379319141:194718423:34329281
		106	TQQSFPLQPQQPFPQQPQQPFPQPQLPFPQ	24.07	3527.76	30	508732623:513130099
		107	MQLQPFPQPQLPYPQPQLPYPQPQPF	24.01	3103.56	26	79013968:154268812:154268826:170724:807780664:807780682
		108	QPGQGQQGYYPTSPQ	24	1634.73	15	1512470134:2569237914:226223:2569237885:22090:2569237855:2569237814:584090046:110341796:2123603159:557367908:14329763:346680615:359500291:2569237937:2569237794:736319:2562262173:1090936466:21779:570441545
		109	SQPQQPFPQQPGQIIPQQPQQPSPLQPQQPF	23.95	3517.77	31	225625626
		110	PQQPPFSQQQLPPFSQQLPPFSQQQQPV	23.28	3230.61	28	51870700:44885908:169666941:169666937:169666929:385845921:169666939:169666931
		111	LQLQPFPQPQLPYPQPQP	23.12	2115.12	18	74026515:74026517:807780718
		112	SQQPFPLQPQQPF	22.89	1540.77	13	225625626:229610232
		113	QPQLPYPQPQLPYPQPQLPYPQPQP	22.85	2938.5	25	7209265:90101520:21673:902375991
		114	LQLQPFPQPQLPYPQPQLPYPQPQPF	22.33	3085.61	26	807780680:154268816
		115	LQQPPFSQQQQPV	22.22	1523.77	13	162414846
		116	LQQPQQPFPQPQ	22.21	1434.73	12	170738:15148398:513129914:205363294
		117	TQQPQQPFPQQPQQPFPQ	22.06	2148.04	18	170738:15148398:513129959:1389711682:1282797655:2123593972:478683577:513129914
		118	SQQPQQTFPQPQ	21.98	1412.67	12	170738:15148398:209971851:1063270:205363294
		119	QSGQGQQGYYPTSPQ	21.79	1624.71	15	1512470134:2569237914:226223:2569237885:22090:2569237855:2569237814:584090046:110341796:2123603159:557367908:14329763:346680615:359500291:2569237937:2569237794:736319:570441545:21743
		120	VQWPQQQQPFPQPQQPF	21.5	2107.03	17	15148387
		121	LQPFPSQQPY	21.49	1203.59	10	79013968:154268812:154268826:807780682
		122	PQQPPFSQQQQQPILPQQPPFSQQQQPV	21.08	3252.63	28	51870700:44885908:169666941:169666937:169666929:385845921:169666935:169666933:485474907:485474827:485474882
		123	LQPQQPFPQQPQQPYPQQPQQPFPQ	20.93	2998.47	25	209971851:205363294
		124	VSFQPSQLNPQ	20.75	1243.62	11	807780682:147883554
		125	SQQQQPVLPQQQPVII	20.68	1830	16	162414846
		126	ASIVAGIGGQ	20.27	871.476	10	170738:15148398:209971869:513129959:1063270:379319139:379319145:379319143:194718421:379319141:205363294:34329281
		127	NIQVDPSGQVQWPQQQPFPQPQPF	20.26	2789.36	24	379319139:379319145:379319143:194718421:379319141:194718423
	WG-PP	1	QQLPQPQQPQQSFPQQQRPF	50.98	2434.21	20	7230478:34329283:170738:513129937:513129955:15148398:121101:513129957:421932705:327178025:1245682825
		2	YYPTSPQQPGQEQQPR	50.88	1902.89	16	2569237705:915195099:634859891:2569237625:21743:345846576:508732625:679602845:2569237645:110341791:2569237720:170743:915195093
		3	LQPQQPQQSFPQQQQPL	47.8	2019.02	17	209971851
		4	LQLQPFPQPQLPYPQPH	47.44	2027.06	17	1359931135
		5	YSSSLQQPGQGLQGHYPA	46.89	1916.9	18	2569237914:226223:2569237885:22090:2569237855:2569237814:584090046:110341796:2123603159:557367908:14329763:346680615:359500291:2569237937:2569237794:1090936466
		6	LGQQQQQFPGQQQPFPPQQPYPQPQPF	45.77	3162.53	27	1258169881:1258169879
		7	SHQQQPFPQQPYPQQPYPS	45.76	2281.06	19	513130097
		8	LQLQPFPQPQLPYPQPQLPYPQPQLPYPQPQP	43.19	3761.96	32	421932500:7209265:147883558:90101520:147883548:21673:902375991
		9	SQPQQQFPQPQQPQQSFPQQQPPFIQPS	41.95	3274.58	28	209971873:209971857:22797758:508732621:22797764:1624701627:1894521615:118772073:1282798543:1624701565:1624701631:1389713229:2234200180:478683587:513129961:4836789
		10	SQQPQQTFPQPQQTFPHQPQQQVPQPQQPQQPF	41.74	3906.88	33	7230478:34329283:170738:513129937:513129955:15148398:121101:513129957:421932705:327178025
		11	VQWPQQQPFPQPQQPF	41.58	1978.97	16	209971873:209971857:209971869:226351:15148393
		12	SSQQGSYYPGQASPQ	41.34	1583.69	15	570441559:162415987:21749:110341797:164504882:262205164:164504881:71084277:347952129:347952125:347952131:347952127:346680613:1092945066
		13	LPQLPYPQPQPFPPQQSYPQPQPQYPQPQQPI	40.99	3750.88	32	1258169881:1258169879
		14	SFQPSQLNPQAQGSVQPQ	40.98	1939.94	18	147883554:332071054:513129894:1258169875:1389814299:147883544:1258169873:1389813018:1101972350:170716:807780682:1256786:902375957:902376089:902376111:1389813673:1258169874
		15	PQLPYPQPQPFPPQQSYPQPQPQYPQPQQPI	40.9	3637.8	31	1258169881:1258169879
		16	FQPSQQNPQAQGSFQPQ	40.71	1915.88	17	74026515:601292788
		17	NMQVDPSGQVQWPQQQPF	40.47	2112.97	18	209971873:209971857:1245682825:209971869:555948556:2123576886:1282796723:260401168:555948554:478683581:2123576888:555948552:1894510589:209971853:1389710910:1894510590:1389713935:555948542:1282796722:421932703:478683579:555948540:555948562:209971885:226351:15148393
		18	QLQPFPQPQPFPPQLPYPQPQ	39.98	2471.26	21	601292788:147883554:332071054:513129894:1258169875:1389814299:147883544:1258169873:1389813018:1101972350:170716
		19	SFQQPQQQYPSSQ	39.97	1551.7	13	421932500:601292788:147883554:332071054:513129894:1258169875:1389814299:147883544:1258169873:1389813018:1101972350:170716:807780682:1256786:902375957:902376089:902376111:1389813673:1258169874:21765:170718
		20	SQQQQIPVIHPSV	39.86	1459.78	13	215402078:254973023:41745908:254973025:41745922:41745895:110559503:254973021:227344088
		21	LQLQPFPQPQPFPPQLPYPQPQ	39.74	2584.35	22	601292788:147883554:332071054:513129894:1258169875:1389814299:147883544:1258169873:1389813018:1101972350:170716
		22	QLQPFPQPQLPYPQPQPF	38.8	2149.1	18	74026515:74026517:421932414:421932420:421932422:421932428:807780718
		23	PQQPPFSQQQQQPILPQQPPFSQQQQPV	38.55	3252.63	28	4090273
		24	LGQQQPFPPQQPYPQPQPFPSQQPY	38.02	2921.41	25	74026517:807780716:154268814
		25	YQQPQHTFPQPQ	37.91	1497.7	12	555948556:2123576886:1282796723:260401168:555948554:478683581:2123576888:555948552:1894510589:209971853:1389710910:1894510590:1389713935:555948542:1282796722:421932703:478683579:555948540:555948562:209971885
		26	IALPVPSQPVDPR	37.74	1387.78	13	1150017191:1905425421:1905425429:1905425419:1905425387:123957:1905425391:1894583401:1905425385:21713:1905425397:1905425431:2234200264:1905425389:1905425393:38098487:1905425423:1634548348:1894588267:2123816602
		27	SHIPGLEKPSQQQPLPL	37.63	1868.02	17	112790696
		28	PLQPQQPFPQQPQQPFPQPQLPFPQ	37.6	2936.5	25	513130097
		29	NIQVDPSGQVQWPQQQPFPQPQPF	37.5	2789.36	24	379319147:379319145:379319139:379319143:194718421
		30	SLQQSGQGQPGYYPT	37.36	1609.74	15	294719862:296280726:50512298:736319:26515125:61966513:194077448
		31	GGSFYPGETTPPQQ	37.04	1464.65	14	2569237705:915195099:634859891:2569237625:21743:345846576:508732625:679602845:2569237645:110341791:2569237720:170743:915195093:294719862:296280726:50512298:736319:26515125:61966513:194077448:1090936466
		32	SLQQPGQGQQQGQGQQGYYPT	36.76	2277.04	21	140169817:21779
		33	IISQQPFPLQPQQPF	36.61	1766.94	15	229610226
		34	FLQPQQPFPQQPQQPYPQQPQQPFPQ	36.38	3145.54	26	209971851:22797758:508732621:22797764:1624701627:1894521615:118772073:1282798543:1624701565:1624701631:1389713229:2234200180:478683587:513129961:4836789:205363294
		35	VRVPVPQLQPQNPSQQQPQ	36.31	2167.15	19	74026515:421932500:1359931135:601292788:7209265:147883558:90101520:147883548:21673:147883554:332071054:513129894:1258169875:1389814299:147883544:1258169873:1389813018:1101972350:170716:74026517:421932414:421932420:421932422:421932428:902375991:421932402:421932404:1258169881:1258169879:807780718:807780682:807780716:154268814:807780680:376341628:807780664:807780726
		36	SQRPQQPFPLQPQQPF	36.29	1921.98	16	229610226:985525183
		37	SQQQLPPFSQQQSPF	36.1	1745.84	15	169666917:335331566:169666951:169666949:169666953:1389706561:1282797659:169666915:385845947:385845896:298160880:485474717:513130074
		38	TQQPQQPFPQFQQPHQPFPQPQ	35.6	2657.28	22	513129959
		39	VYYPTSPQQPGQLQQPAQGQQGYYPTSPQ	35.36	3235.52	29	570441559:162415987:21749:110341797:164504882:262205164:164504881:71084277:347952129:347952125:347952131:347952127:346680613
		40	VQWPQQQPVPQPHQPF	35.29	1939.97	16	209971851:22797758:508732621:22797764:1624701627:1894521615:118772073:1282798543:1624701565:1624701631:1389713229:2234200180:478683587:513129961:4836789:209971843:205363286
		41	QSGQGQQPGQGQSGYFPTS	35.27	1937.85	19	570441559:162415987:21749:110341797:164504882:262205164:164504881:71084277:347952129:347952125:347952131:347952127:346680613
		42	SGPELTIEMILQAAQPK	35.16	1824.97	17	1894630985:2123835923:1894595286:1894630983:1894630986:2123817554:1894630982:1894630984
		43	SFQQPQQQYPSGQ	34.96	1521.68	13	74026515:1359931135:7209265:147883558:90101520:147883548:21673:421932414:421932420:421932422:421932428:421932402:421932404:376341628
		44	SHQQQPFPQQPYPQQPYPSQQPYPS	34.53	2981.37	25	513130097
		45	STLTDSLVAAAGIIAQEVAGDVR	34.32	2256.2	23	1894569194:1894554953:1894601507:1894561937:1894601506:1894577756
		46	NMQVDPSGQVQWPQQQPFPQPQQPF	34.24	2935.37	25	209971873:209971857:209971869:226351:15148393
		47	SQQQQPPFSQQQPPFSQQQQPVLPQQPS	34.08	3216.56	28	169666917:335331566:169666951:169666949:169666953:1389706561:1282797659:169666915:385845947:385845896:298160880:485474717:513130074
		48	VPVPQLQPQNPSQQQPQEQVPL	33.83	2478.29	22	74026515:421932500:1359931135:601292788:7209265:147883558:90101520:147883548:21673:147883554:332071054:513129894:1258169875:1389814299:147883544:1258169873:1389813018:1101972350:170716:74026517:421932414:421932420:421932422:421932428:902375991:421932402:421932404:1258169881:1258169879:807780718:807780716:154268814:807780680:376341628
		49	VQWPQQQPVPQPH	33.8	1567.79	13	209971851:22797758:508732621:22797764:1624701627:1894521615:118772073:1282798543:1624701565:1624701631:1389713229:2234200180:478683587:513129961:4836789:209971843:205363286
		50	LQLQPFPQPQLPYPQPQPF	33.73	2262.18	19	74026515:74026517:421932414:421932420:421932422:421932428:807780718
		51	VSFQQPQQQYPSSQV	33.7	1749.83	15	421932500:601292788:147883554:332071054:513129894:1258169875:1389814299:147883544:1258169873:1389813018:1101972350:170716:807780682:1256786:902375957:902376089:902376111:1389813673:1258169874
		52	RPQQPYPQPQPQYSQPQQPI	33.33	2404.19	20	74026515:1359931135:74026517:421932414:421932420:421932422:421932428:421932402:421932404:807780718:807780682:807780716:154268814:807780680:376341628
		53	FQPSQQNPQAQGSFQPQQLPQ	33.15	2382.14	21	74026515:601292788
		54	SQQPPISQQQQQQQQQQQPF	33.04	2408.15	20	215402078:254973023:41745908:254973025:41745922:41745895:110559503:254973021:227344088
		55	SQQQLPPFSQQQQPPFSQQQQPVLPQQPS	32.95	3329.64	29	4090273:485474986
		56	NMQVDPSGQVQWPQQQLVPQPQQPL	32.82	2869.42	25	513129959:513129914
		57	SQQQPPFWQQQPPFSQQQPILPQQPPFSQQ	32.67	3573.74	30	9967353:39923010:85815960:39923100:21773:85815958:123204244:163860188:56480804:56480776:56480810:164470666:56480802:56480786:56480792:56480780:56480798:17425212:56480796:194718429:56480794:85815962:56480784:56480790:56480782:56480788:56480800
		58	QLQPFPQPQLPYPQPQLPYPQPQLPYPQPQPF	32.58	3795.95	32	421932500:7209265:147883558:90101520:147883548:21673:902375991
		59	AQLPFPQQPQQPFPQPQQPQQPFPQ	32.12	2925.46	25	555948556:2123576886:1282796723:260401168:555948554:478683581:2123576888:555948552:1894510589:209971853:1389710910:1894510590:1389713935:555948542:1282796722:421932703:478683579:555948540:555948562:209971885:209971843
		60	VSFQQPQQQYPSSQ	31.91	1650.76	14	421932500:601292788:147883554:332071054:513129894:1258169875:1389814299:147883544:1258169873:1389813018:1101972350:170716:807780682:1256786:902375957:902376089:902376111:1389813673:1258169874:21765:170718
		61	LQLQPFPQPQLPYPQPQLPYPQPQLPYPQPQPF	31.6	3909.03	33	421932500:7209265:147883558:90101520:147883548:21673:902375991
		62	LQPFPQPQLPYPQPQLPYPQPQPF	31.59	2844.46	24	421932402:421932404:807780682:807780680:807780664
		63	LQLQPFPQPQLPYPQPQLPYPQPQPF	31.51	3085.61	26	421932402:421932404:807780680
		64	LQLQPFPQPQLPY	31.43	1567.84	13	74026515:421932500:1359931135:7209265:147883558:90101520:147883548:21673:74026517:421932414:421932420:421932422:421932428:902375991:421932402:421932404:807780718:807780716:154268814:807780680
		65	SQQPQQAFPQPQ	31.41	1382.66	12	513129959:513129914
		66	QLPFPQQPQQPFPQPQQPQQPFPQ	31.38	2854.42	24	555948556:2123576886:1282796723:260401168:555948554:478683581:2123576888:555948552:1894510589:209971853:1389710910:1894510590:1389713935:555948542:1282796722:421932703:478683579:555948540:555948562:209971885:226351:15148393:209971843:379319147:379319145:379319139:379319143:194718421
		67	LQLQPFPQPQLPYPQPQLPYPQPQP	31.29	2938.54	25	421932402:421932404:807780680
		68	LQLQPFPQPQLPYPQPQP	31.29	2115.12	18	74026515:74026517:421932414:421932420:421932422:421932428:807780718
		69	SQQPQQPFPQPQQPQQSFPQQQQPL	31.15	2943.43	25	555948556:2123576886:1282796723:260401168:555948554:478683581:2123576888:555948552:1894510589:209971853:1389710910:1894510590:1389713935:555948542:1282796722:421932703:478683579:555948540:555948562:209971885:209971843
		70	WQELGQGQQGYYPT	31.05	1653.74	14	2569237914:226223:2569237885:22090:2569237855:2569237814:584090046:110341796:2123603159:557367908:14329763:346680615:359500291:2569237937:2569237794
		71	FPQPQQTFPHQPQQQVPQPQQPQQPF	31.02	3109.52	26	7230478:34329283:170738:513129937:513129955:15148398:121101:513129957:421932705:327178025:513129959:513129914
		72	LQPQNPSQQQPQEQVPL	30.99	1957.99	17	74026515:421932500:1359931135:601292788:7209265:147883558:90101520:147883548:21673:147883554:332071054:513129894:1258169875:1389814299:147883544:1258169873:1389813018:1101972350:170716:74026517:421932414:421932420:421932422:421932428:902375991:421932402:421932404:1258169881:1258169879:807780718:807780716:154268814:807780680:376341628
		73	IISQRPQQPFPLQPQQPF	30.96	2148.15	18	229610226:985525183
		74	LVLPQQQIPF	30.9	1181.68	10	169666917:335331566:169666951:169666949:169666953:1389706561:1282797659:169666915:385845947:385845896:298160880:485474717:513130074:112790696
		75	RPQQPYPQSQPQYSQPQQPI	30.89	2394.17	20	421932500:7209265:147883558:90101520:147883548:21673:902375991
		76	LGQQQPFPPQQPYPQPQPFPS	30.55	2405.18	21	74026517:807780716:154268814
		77	LQPHQIAQLEVMTSIALR	30.17	2047.12	18	9967353:39923010:85815960:39923100:21773:85815958:123204244:163860188:56480804:56480776:56480810:164470666:56480802:56480786:56480792:56480780:56480798:17425212:56480796:194718429:56480794:85815962:56480784:56480790:56480782:56480788:56480800:169666917:335331566:169666951:169666949:169666953:1389706561:1282797659:169666915:385845947:385845896:298160880:485474717:513130074:215402078:254973023:4174…
		78	VQGQGIIQPQQPA	29.88	1362.73	13	7230478:34329283:170738:513129937:513129955:15148398:121101:513129957:421932705:327178025:209971851:209971873:209971857:22797758:508732621:22797764:1624701627:1894521615:118772073:1282798543:1624701565:1624701631:1389713229:2234200180:478683587:513129961:4836789:1245682825:209971869:555948556:2123576886:1282796723:260401168:555948554:478683581:2123576888:555948552:1894510589:209971853:1389710910:…
		79	VSFQQPQQQYPL	29.88	1461.73	12	902375991:807780718:807780716:807780680:807780664:807780726
		80	AGSFYPSETTPSQQ	29.6	1498.66	14	570441559:162415987:21749:110341797:164504882:262205164:164504881:71084277:347952129:347952125:347952131:347952127:346680613
		81	SLQQPGQGQQGHYPA	29.41	1594.75	15	2569237914:226223:2569237885:22090:2569237855:2569237814:584090046:110341796:2123603159:557367908:14329763:346680615:359500291:2569237937:2569237794:1090936466:140169817:21779:1092945066
		82	QQYPLGQGSFRPSQQNPQAQGSVQPQ	29.34	2854.37	26	74026517:902375991:807780718:807780716:807780664:807780726
		83	PQQPPFSQQQQQQILPQQPPFSQQQHPV	29.2	3292.64	28	485474986
		84	LQPGQGQQGYYPT	29.13	1435.67	13	570441559:162415987:21749:110341797:164504882:262205164:164504881:71084277:347952129:347952125:347952131:347952127:346680613:294719862:296280726:50512298:736319:26515125:61966513:194077448
		85	YQPQQPFPQQPGQIIPQQPQQPSPLQPQQPF	29	3593.81	31	985525183
		86	LQPQQPFPQQPQQPYPQQPQQPFPQ	28.86	2998.47	25	209971851:22797758:508732621:22797764:1624701627:1894521615:118772073:1282798543:1624701565:1624701631:1389713229:2234200180:478683587:513129961:4836789:205363294
		87	LQLQPFPQPQLP	28.83	1404.78	12	74026515:421932500:1359931135:7209265:147883558:90101520:147883548:21673:74026517:421932414:421932420:421932422:421932428:902375991:421932402:421932404:807780718:807780716:154268814:807780680
		88	FQQPHQPFPQPQ	28.8	1477.71	12	513129959
		89	GGSFYPGETTPL	28.65	1224.57	12	2569237914:226223:2569237885:22090:2569237855:2569237814:584090046:110341796:2123603159:557367908:14329763:346680615:359500291:2569237937:2569237794:140169817:21779
		90	LVQGQGIIQPQQPA	28.6	1475.81	14	7230478:34329283:170738:513129937:513129955:15148398:121101:513129957:421932705:327178025:209971851:209971873:209971857:22797758:508732621:22797764:1624701627:1894521615:118772073:1282798543:1624701565:1624701631:1389713229:2234200180:478683587:513129961:4836789:1245682825:209971869:555948556:2123576886:1282796723:260401168:555948554:478683581:2123576888:555948552:1894510589:209971853:1389710910:…
		91	LQLQPFPQPQLPYPQPHLPYPQPQPF	28.35	3094.61	26	1359931135
		92	LPYPQPQLPYPQPQPF	28.32	1908.98	16	421932500:7209265:147883558:90101520:147883548:21673:902375991:421932402:421932404:807780682:807780680:807780664
		93	QTFPHQPQQQVPQPQQPQQPF	28.27	2512.22	21	7230478:34329283:170738:513129937:513129955:15148398:121101:513129957:421932705:327178025:513129959:513129914
		94	SQQQQQQLFPQQPS	28.15	1670.8	14	9967353:39923010:85815960:39923100:21773:85815958:123204244
		95	RPQQPYPQPQPQ	27.94	1462.73	12	74026515:1359931135:74026517:421932414:421932420:421932422:421932428:421932402:421932404:807780718:807780682:807780716:154268814:807780680:376341628
		96	SQQQPPFWQQQPPFSQQQPI	27.87	2423.17	20	9967353:39923010:85815960:39923100:21773:85815958:123204244:163860188:56480804:56480776:56480810:164470666:56480802:56480786:56480792:56480780:56480798:17425212:56480796:194718429:56480794:85815962:56480784:56480790:56480782:56480788:56480800
		97	VSFQPSQLNPQ	27.86	1243.62	11	147883554:332071054:513129894:1258169875:1389814299:147883544:1258169873:1389813018:1101972350:170716:807780682:1256786:902375957:902376089:902376111:1389813673:1258169874
		98	SQQQQLFPQQPS	27.85	1414.68	12	163860188:56480804:56480776:56480810:164470666:56480802:56480786:56480792:56480780:56480798:17425212:56480796:194718429:56480794:85815962:56480784:56480790:56480782:56480788:56480800
		99	LQLQPFPQPQPF	27.56	1438.76	12	601292788:147883554:332071054:513129894:1258169875:1389814299:147883544:1258169873:1389813018:1101972350:170716:1256786:902375957:902376089:902376111:1389813673:1258169874:21765:170718:807780726
		100	FQPSQQNPQAQG	27.52	1328.61	12	74026515:1359931135:601292788:7209265:147883558:90101520:147883548:21673:421932414:421932420:421932422:421932428:421932402:421932404:1258169881:1258169879:154268814:376341628:21765:170718
		101	SQQQPPFWQQQPPFSQQQPILPQQPPFS	27.4	3317.63	28	9967353:39923010:85815960:39923100:21773:85815958:123204244:163860188:56480804:56480776:56480810:164470666:56480802:56480786:56480792:56480780:56480798:17425212:56480796:194718429:56480794:85815962:56480784:56480790:56480782:56480788:56480800
		102	QVQWPQQQPFPQPQQPF	27.35	2107.03	17	209971873:209971857:209971869:226351:15148393
		103	VRVPVPQLQPQNPSQQQPQEQVPL	27.34	2733.46	24	74026515:421932500:1359931135:601292788:7209265:147883558:90101520:147883548:21673:147883554:332071054:513129894:1258169875:1389814299:147883544:1258169873:1389813018:1101972350:170716:74026517:421932414:421932420:421932422:421932428:902375991:421932402:421932404:1258169881:1258169879:807780718:807780716:154268814:807780680:376341628
		104	LQPGQGQQGYYPTSPQ	27.28	1747.82	16	570441559:294719862:296280726:50512298:736319:26515125:61966513:194077448
		105	SSLQPEQGQQGYYPT	27.08	1681.76	15	2569237705:915195099:634859891:2569237625:21743:345846576:508732625:679602845:2569237645:110341791:2569237720:170743:915195093
		106	SLQQPGQGQQIGQGQQGYYPTSPQ	26.88	2574.21	24	2569237914:226223:2569237885:22090:2569237855:2569237814:584090046:110341796:2123603159:557367908:14329763:346680615:359500291:2569237937:2569237794:140169817:21779
		107	VSFQQPQQQYPSGQ	26.87	1620.75	14	74026515:1359931135:7209265:147883558:90101520:147883548:21673:421932414:421932420:421932422:421932428:421932402:421932404:376341628
		108	WLQPGQGQQGYYPT	26.76	1621.75	14	570441559:162415987:21749:110341797:164504882:262205164:164504881:71084277:347952129:347952125:347952131:347952127:346680613:294719862:296280726:50512298:736319:26515125:61966513:194077448
		109	QLGQGQQSGQGQLGYYPTSPQ	26.59	2221.04	21	2569237705:915195099:634859891:2569237625:21743:345846576:508732625:679602845:2569237645:110341791:2569237720:170743:915195093
		110	QIIPQQPQQPFPL	26.4	1532.84	13	229610226:985525183:2123577445
		111	PQQPPFSQQQLPPFSQQLPPFSQQQQPV	26.39	3230.61	28	4090273:485474986
		112	PQQPPFSQQQQPV	25.92	1507.74	13	9967353:39923010:85815960:39923100:21773:85815958:123204244:163860188:56480804:56480776:56480810:164470666:56480802:56480786:56480792:56480780:56480798:17425212:56480796:194718429:56480794:85815962:56480784:56480790:56480782:56480788:56480800:4090273
		113	QLQPFPQPQLPYPQPHLPYPQPQPF	25.77	2981.52	25	1359931135
		114	VQIIPQQPQQPFPL	25.54	1631.9	14	2123577445
		115	VGHPEWEFPR	25.41	1252.6	10	1894630985:2123835923:1894595286:1894630983:1894630986:2123817554:1894630982:1894630984
		116	SYQQPQQQYPSGQ	25.23	1537.68	13	1258169881:1258169879
		117	FSQSQQPFPQQPQQPFPLQPQQPFPQQPA	25.05	3374.65	29	2123577445
		118	QSGQGQQGYYPTSPQ	24.88	1624.71	15	570441559:162415987:21749:110341797:164504882:262205164:164504881:71084277:347952129:347952125:347952131:347952127:346680613:2569237914:226223:2569237885:22090:2569237855:2569237814:584090046:110341796:2123603159:557367908:14329763:346680615:359500291:2569237937:2569237794:2569237705:915195099:634859891:2569237625:21743:345846576:508732625:679602845:2569237645:110341791:2569237720:170743:91519509…
		119	SQQPQQTFPQPQ	24.81	1412.67	12	7230478:34329283:170738:513129937:513129955:15148398:121101:513129957:421932705:327178025:209971851:22797758:508732621:22797764:1624701627:1894521615:118772073:1282798543:1624701565:1624701631:1389713229:2234200180:478683587:513129961:4836789:205363294:205363286
		120	QQGYYPTSPQQPGQGQQLGQGQPGYYPT	24.8	3052.39	28	570441559:162415987:21749:110341797:164504882:262205164:164504881:71084277:347952129:347952125:347952131:347952127:346680613
		121	PVGIFGTN	24.71	803.418	8	7209265:147883558:90101520:147883548:21673:421932414:421932420:421932422:421932428:421932402:421932404:154268814
		122	LQQPQQPFPQPQ	24.31	1434.73	12	7230478:34329283:170738:513129937:513129955:15148398:121101:513129957:421932705:327178025:1245682825:513129914:205363294:2123577445
		123	LQLQPFPQPQPFLPQLPYPQPQ	23.92	2600.38	22	1256786:902375957:902376089:902376111:1389813673:1258169874:21765:170718:807780726
		124	ASIVAGIGGQ	23.62	871.476	10	7230478:34329283:170738:513129937:513129955:15148398:121101:513129957:421932705:327178025:209971869:513129959:205363294:205363286:379319147:379319145:379319139:379319143:194718421
		125	LQPQQAFPQQPQQPFPQ	23.25	2006	17	513129959:513129914
		126	SLQQPGQGQQIGQGQQGYYPT	23.23	2262.07	21	2569237914:226223:2569237885:22090:2569237855:2569237814:584090046:110341796:2123603159:557367908:14329763:346680615:359500291:2569237937:2569237794:140169817:21779
		127	SQPQPFRPQQPYPQPQPQ	23.13	2147.05	18	807780716:154268814:376341628
		128	QPFPQPQLPYPQPQLPYPQPQPF	22.92	2731.38	23	421932402:421932404:807780682:807780680:807780664
		129	SQQPFPLQPQQPF	22.7	1540.77	13	229610226
		130	VQWPQQQFP	22.65	1156.57	9	209971879
		131	SQQQPPFWQQQPPFSQQQPILPQQPPFSQQQ	22.54	3701.8	31	9967353:39923010:85815960:39923100:21773:85815958:123204244:163860188:56480804:56480776:56480810:164470666:56480802:56480786:56480792:56480780:56480798:17425212:56480796:194718429:56480794:85815962:56480784:56480790:56480782:56480788:56480800
		132	TQQPQQPFPQLQQPQQPFPQPQ	22.43	2614.29	22	7230478:34329283:170738:513129937:513129955:15148398:121101:513129957:421932705:327178025:1245682825:513129914:205363294
		133	SYQQPQQQYPSGQG	22.37	1594.7	14	1258169881:1258169879
		134	SLQQPGQGQQLGQGQPGYYPT	22.32	2231.06	21	162415987:21749:110341797:164504882:262205164:164504881:71084277:347952129:347952125:347952131:347952127:346680613
		135	SQQPQQPFPQQPHQPQQPYPQ	22.15	2512.19	21	513130097
		136	SQQPQQIFPQPQ	22.02	1424.7	12	1245682825
		137	LPYPQPQPF	21.98	1085.55	9	74026515:421932500:1359931135:7209265:147883558:90101520:147883548:21673:74026517:421932414:421932420:421932422:421932428:902375991:421932402:421932404:1258169881:1258169879:807780718:807780682:807780680:807780664
		138	LQLQPFPQPQLPYPQPQLPYPQPQ	21.76	2841.49	24	421932500:7209265:147883558:90101520:147883548:21673:902375991:421932402:421932404:807780680
		139	QLQPFPQPQLP	21.45	1291.69	11	74026515:421932500:1359931135:7209265:147883558:90101520:147883548:21673:74026517:421932414:421932420:421932422:421932428:902375991:421932402:421932404:807780718:807780682:807780716:154268814:807780680:807780664
		140	QLQPFPQPQLPYPQPQLPYPQPQPF	21.13	2972.52	25	421932402:421932404:807780682:807780680:807780664
		141	QLGQGQQGYYPT	21.01	1338.62	12	2569237705:915195099:634859891:2569237625:21743:345846576:508732625:679602845:2569237645:110341791:2569237720:170743:915195093:294719862:296280726:50512298:736319:26515125:61966513:194077448:1090936466:1092945066
		142	QIGQGQQGYYPT	21.01	1338.62	12	2569237914:226223:2569237885:22090:2569237855:2569237814:584090046:110341796:2123603159:557367908:14329763:346680615:359500291:2569237937:2569237794:140169817:21779
		143	VQGQGIIQPQQPAQ	21.01	1490.78	14	7230478:34329283:170738:513129937:513129955:15148398:121101:513129957:421932705:327178025:209971851:209971873:209971857:22797758:508732621:22797764:1624701627:1894521615:118772073:1282798543:1624701565:1624701631:1389713229:2234200180:478683587:513129961:4836789:1245682825:209971869:555948556:2123576886:1282796723:260401168:555948554:478683581:2123576888:555948552:1894510589:209971853:1389710910:…
		144	QQSGQGQQGYYPISPQ	20.9	1764.81	16	2569237705:915195099:634859891:2569237625:21743:345846576:508732625:679602845:2569237645:110341791:2569237720:170743:915195093
		145	TQQPQQPFPQ	20.56	1197.58	10	7230478:34329283:170738:513129937:513129955:15148398:121101:513129957:421932705:327178025:209971873:209971857:1245682825:209971869:513129959:226351:15148393:513129914:205363294:205363286:209971879
		146	QPFPQPQLPYPQPQLPYPQPQLPYPQPQPF	20.45	3554.8	30	421932500:7209265:147883558:90101520:147883548:21673:902375991
		147	MQLQPFPQPQLPYPQPQLPYPQPQP	20.44	2956.49	25	807780682:807780664
		148	SLWQPGQGQQG	20.32	1184.56	11	162415987:21749:110341797
		149	LQLQPFPQPQ	20.14	1194.64	10	74026515:421932500:1359931135:601292788:7209265:147883558:90101520:147883548:21673:147883554:332071054:513129894:1258169875:1389814299:147883544:1258169873:1389813018:1101972350:170716:74026517:421932414:421932420:421932422:421932428:902375991:421932402:421932404:807780718:807780716:154268814:807780680:376341628:1256786:902375957:902376089:902376111:1389813673:1258169874:21765:170718:807780726
	WG-PP-LC/AA	1	LQLQPFPQPQLPYPQPH	54.41	2027.06	17	1101972374:2359685215:1184250144:902376029:1359931135:2123921187
		2	SHQQQPFPQQPYPQQPYPSQQPYPS	48.31	2981.37	25	508732623:1389715110:1282798550:1863295322:1389715540:1282798552:1863295309:555948505:208605344:1282798551:1389714864:1863295324:513130101:555948509:555948503
		3	AGSFYPSETTPSQQ	48.24	1498.66	14	21749:110341797:109452233:164504882:262205164:164504881:71084277:347952129:347952125:347952131:347952127:346680613:570441559:1512470134:94315065:459353913:2569237768:45387433:641467845:584090044
		4	SHQQQPFPQQPYPQQPYPS	47.62	2281.06	19	508732623:1389715110:1282798550:1863295322:1389715540:1282798552:1863295309:555948505:208605344:1282798551:1389714864:1863295324:513130101:555948509:555948503
		5	YSSSLQQPGQGLQGHYPA	46.43	1916.9	18	2569237914:2569237885:2569237855:2569237814:584090046:2123603159:557367908:2569237937:2569237794:226223:22090:110341796:14329763:346680615:359500291:1090936466
		6	TASLQQPGQGQQGHYPA	46.32	1766.83	17	570441545:2569237914:2569237885:2569237855:2569237814:584090046:2123603159:557367908:2569237937:2569237794:226223:22090:110341796:14329763:346680615:359500291:1090936466
		7	NIQVDPSGQVQWPQQQQPFPQPQQPF	46.27	3045.47	26	15148387
		8	LISQQPFPLQPQQPF	46.27	1766.94	15	229610232
		9	IISQQPFPLQPQQPF	46.27	1766.94	15	985525197:225625626:229610226:229610234:985525189:229610228
		10	LQPQQPQQSFPQQQQPL	44.64	2019.02	17	209971851:209971883
		11	VSFQQPQQQYPSSQ	44.52	1650.76	14	421932500:601292788:807780682:147883554:1256786:902375957:902376089:902376111:1389813673:1258169874:21765:170718
		12	LQLQPFPQPQLPYPQPQLPYPQPQPF	41.8	3085.61	26	421932402:421932484:807780680:421932462
		13	QLQPFPQPQLPYPQPQLPYPQPQLPYPQPQPF	41.6	3795.95	32	421932500:902375991:7209265:147883558:90101520:147883548:21673
		14	NMQVDPSGQVQWPQQQPF	41.46	2112.97	18	260401168:209971853:421932703:209971885:209971911:209971873:209971857:209971907
		15	QLQPFPQPQLPYPQPQLPYPQPQP	41.22	2825.45	24	421932402:421932484:807780680:807780682:421932462:807780692:807780664
		16	RPQQPYPQPQPQYSQPQQPI	41.16	2404.19	20	1101972374:2359685215:1184250144:902376029:1359931135:2123921187:807780690:74026515:421932402:421932484:807780680:807780718:74026517:807780682:807780716:376341628:154268814:513129892:147883546:21755:170720:421932526
		17	VRVPVPQLQPQNPSQQQPQ	40.88	2167.15	19	1101972374:2359685215:1184250144:902376029:1359931135:2123921187:807780690:74026515:421932402:421932484:421932500:902375991:807780680:807780718:7209265:147883558:90101520:147883548:21673:74026517:601292788:807780682:421932462:807780716:147883554:376341628:807780692:154268814:513129892:807780664:807780726:513129824
		18	VQWPQQQPVPQPH	40.84	1567.79	13	209971851:1624701583:22797758:508732621:22797764:1624701627:1894521615:118772073:1282798543:1624701565:1624701631:1389713229:2234200180:478683587:513129961:4836789:10638230:10638290:34329285:1729914728:513129918:209971843
		19	SLQQPGQGQQIGQGQQGYYPT	40.84	2262.07	21	570441545:2569237914:2569237885:2569237855:2569237814:584090046:2123603159:557367908:2569237937:2569237794:226223:22090:110341796:14329763:346680615:359500291
		20	FQPSQQNPQAQGSFQPQQLPQ	40.78	2382.14	21	807780690:74026515:601292788:147883564
		21	SFRPSQQNPQAQGSVQPQ	40.66	1982.96	18	902375991:807780718:74026517:421932462:807780716:807780664:147883546:21755:170720:421932526:807780726
		22	LQLQPFPQPQLPYPQPQLPYPQPQLPYPQPQP	40.49	3761.96	32	421932500:902375991:7209265:147883558:90101520:147883548:21673
		23	QSGQGQQPGQGQSGYFPTS	40.4	1937.85	19	21749:110341797:109452233:164504882:262205164:164504881:71084277:347952129:347952125:347952131:347952127:346680613:570441559:1512470134:94315065:459353913:2569237768:45387433:641467845:584090044
		24	SQQPPISQQQQQQQQQQQPF	39.9	2408.15	20	215402078:41745895:227344088
		25	NIQVDPSGQVQWPQQQPFPQPQPF	39.77	2789.36	24	379319147:379319145:379319139:379319143:194718421:372292210:194718423:379319141
		26	QQLPQPQQPQQSFPQQQRPF	39.44	2434.21	20	15148398:327178025:170738
		27	SSQQGSYYPGQASPQ	39.35	1583.69	15	21749:110341797:109452233:164504882:262205164:164504881:71084277:347952129:347952125:347952131:347952127:346680613:570441559:1512470134:94315065:459353913:2569237768:45387433:641467845:584090044
		28	SQQQQIPVIHPSV	39.16	1459.78	13	215402078:41745895:227344088
		29	YYPTSPQQPGQEQQPR	39.02	1902.89	16	508732625:679602845:2569237645:2569237720:2569237705:915195099:634859891:2569237625:170743:110341791:21743:915195093:345846576:539759916:106640051:915195097
		30	IALPVPSQPVDPR	38.63	1387.78	13	1150017191:1905425421:1905425429:1905425419:1905425387:123957:1905425391:1894583401:1905425385:21713:1905425397:1905425431:2234200264:1905425389:1905425393:38098487:1905425423:1634548348:1894588267:2123816602
		31	FQPSQQNPQAQGSFQPQ	37.09	1915.88	17	807780690:74026515:601292788:147883564
		32	VQWPQQQPVPQPHQPF	36.94	1939.97	16	209971851:1624701583:22797758:508732621:22797764:1624701627:1894521615:118772073:1282798543:1624701565:1624701631:1389713229:2234200180:478683587:513129961:4836789:10638230:10638290:34329285:1729914728:513129918:209971843
		33	QLQPFPQPQLPYPQPQPF	36.66	2149.1	18	807780690:74026515:807780718:74026517
		34	VSFQQPQQQYPL	36.66	1461.73	12	902375991:807780680:807780718:807780716:807780664:807780726:902376097
		35	GGSFYPGETTPPQQ	36.11	1464.65	14	1090936466:508732625:679602845:2569237645:2569237720:2569237705:915195099:634859891:2569237625:170743:110341791:21743:915195093:345846576:539759916:106640051:915195097:662357279:873859815:2123620161:2123620159:601093911:2123620157:478428127:399933061:294719862:296280726:50512298:736319:26515125:61966513:194077448:162415985:110341804:288860106:226088593:262205115
		36	WLQPGQGQQGYYPT	35.61	1621.75	14	21749:110341797:109452233:164504882:262205164:164504881:71084277:347952129:347952125:347952131:347952127:346680613:570441559:1512470134:94315065:459353913:2569237768:45387433:641467845:662357279:873859815:2123620161:2123620159:601093911:2123620157:478428127:399933061:294719862:296280726:50512298:736319:26515125:61966513:194077448:162415985:110341804:288860106:226088593:262205115
		37	STLTDSLVAAAGIIAQEVAGDVR	35.44	2256.2	23	1894608497:1894608496:2123854848:1894569194:1894601508:2123709823:2123875354:1894554953:1894601507:1894561937:1894636684:1894601506:2123950221:2123854846:2123784591:2123761560:2123784589:1894608495:2123854844:2123734107:1894630734:1894577756:1894643759:2123875359:1894636777:2123875356:2123936661
		38	VQQQQFPGQQQPFPPQQPYPQPQPFPSQQPY	35.11	3663.75	31	1101972374:2359685215:1184250144:902376029:1359931135:2123921187:74026515:421932402:421932484:421932500:902375991:807780680:807780718:7209265:147883558:90101520:147883548:21673:421932462:147883554:376341628:807780726
		39	SQQPQQPFPQPQQPQQSFPQQQQPL	35	2943.43	25	209971843:260401168:209971853:421932703:209971885:209971911:209971907
		40	QLQPFPQPQLPYPQPHLPYPQPQPF	34.78	2981.52	25	1101972374:2359685215:1184250144:902376029:1359931135:2123921187
		41	SLQQSGQGQPGYYPT	34.62	1609.74	15	662357279:873859815:2123620161:2123620159:601093911:2123620157:478428127:399933061:294719862:296280726:50512298:736319:26515125:61966513:194077448:162415985:110341804:288860106:226088593:262205115
		42	QQSGQGQQGYYPISPQ	34.51	1764.81	16	508732625:679602845:2569237645:2569237720:2569237705:915195099:634859891:2569237625:170743:110341791:21743:915195093:345846576:539759916:106640051:915195097
		43	LQLQPFPQPQLPYPQPQPF	34.46	2262.18	19	807780690:74026515:807780718:74026517
		44	PQQPPFSQQQLPPFSQQLPPFSQQQQPV	34.18	3230.61	28	51870700:44885908:169666941:169666937:169666929:169666931
		45	SQQQLPPFSQQQSPF	34.17	1745.84	15	335331566
		46	SQPQPFRPQQPYPQPQPQ	34.08	2147.05	18	807780716:376341628:154268814:513129892:147883546:21755:170720:421932526
		47	FQPSQQNPQAQG	34.05	1328.61	12	1101972374:2359685215:1184250144:902376029:1359931135:2123921187:807780690:74026515:421932402:421932484:7209265:147883558:90101520:147883548:21673:601292788:376341628:807780692:154268814:147883564:21765:170718:383210736:902375939:383210737
		48	TQQPQQPFPQFQQPHQPFPQPQ	33.69	2657.28	22	513129959
		49	SQQQPGQGQQGHYPA	33.63	1609.72	15	570441545:584090044
		50	FLQPQQPQQSFPQQQQPL	33.5	2166.09	18	209971851:209971883
		51	LTLSQQQQLGQGT	33.44	1400.73	13	513129918:513129959
		52	LQPQNPSQQQPQEQVPL	33.4	1957.99	17	1101972374:2359685215:1184250144:902376029:1359931135:2123921187:807780690:74026515:421932402:421932484:421932500:902375991:807780680:807780718:7209265:147883558:90101520:147883548:21673:74026517:601292788:421932462:807780716:147883554:376341628:807780692:154268814:513129892:147883546:21755:170720:421932526:147883564:513129824:902376097
		53	LQLQPFPQPQPFPPQLPYPQPQ	33.19	2584.35	22	601292788:147883554
		54	NMQVDPSGQVQWPQQQLVPQPQQPL	33.14	2869.42	25	513129959:513129914
		55	SLQQPGQGQQGHYPA	32.89	1594.75	15	570441545:2569237914:2569237885:2569237855:2569237814:584090046:2123603159:557367908:2569237937:2569237794:226223:22090:110341796:14329763:346680615:359500291:1090936466
		56	IISQQPFPLEPQQPF	32.8	1767.92	15	225625614
		57	LQLQPFPQPQLPYPQPHLPYPQPQPF	32.3	3094.61	26	1101972374:2359685215:1184250144:902376029:1359931135:2123921187
		58	TQQSFPLQPQQPFPQQPQQPFPQPQLPFPQ	32.1	3527.76	30	508732623:1389715110:1282798550:1863295322:1389715540:1282798552:1863295309:555948505
		59	PQQPPFSQQQQQPILPQQPPFSQQQQPV	32	3252.63	28	51870700:44885908:169666941:169666937:169666929
		60	IISQRPQQPFPLQPQQPF	31.92	2148.15	18	985525197:229610232:225625626:229610226:229610234:985525189:229610228
		61	FLQPQQPFPQQPQQPYPQQPQQPFPQ	31.7	3145.54	26	209971851:1624701583:22797758:508732621:22797764:1624701627:1894521615:118772073:1282798543:1624701565:1624701631:1389713229:2234200180:478683587:513129961:4836789:10638230:10638290:34329285:1729914728:513129918:205363294
		62	SQQQQPPFSQQQPPFSQQQQPVLPQQPS	31.65	3216.56	28	335331566
		63	QQFPQPQQPQQSIPQQQQPL	31.64	2372.19	20	440222343:440222345
		64	VPVPQLQPQNPSQQQPQEQVPL	31.58	2478.29	22	1101972374:2359685215:1184250144:902376029:1359931135:2123921187:807780690:74026515:421932402:421932484:421932500:902375991:807780680:807780718:7209265:147883558:90101520:147883548:21673:74026517:601292788:421932462:807780716:147883554:376341628:807780692:154268814:513129892:513129824
		65	SQQQQLFPQQPS	31.54	1414.68	12	56480818:163860188:56480804:56480776:56480816:56480810:164470666:56480802:56480786:56480814:56480792:56480780:56480798:17425212:56480796:194718429:56480820:56480794:85815962:56480784:56480790:56480782:56480788:56480812:56480800:17425182
		66	SQQPQQTFPQPQQTFPHQPQQQVPQPQQPQQPF	31.46	3906.88	33	15148398:327178025:170738
		67	VQQQIPVVQPS	31.46	1221.67	11	56480818:163860188:56480804:56480776:56480816:56480810:164470666:56480802:56480786:56480814:56480792:56480780:56480798:17425212:56480796:194718429:56480820:56480794:85815962:56480784:56480790:56480782:56480788:56480812:56480800:9967353:1857658:39923010:85815960:1857654:39923100:21773:85815958:223007038:123204244:223007036:17425182
		68	PLQPQQPFPQQPQQPFPQPQLPFPQ	31.44	2936.5	25	508732623:1389715110:1282798550:1863295322:1389715540:1282798552:1863295309:555948505
		69	SQRPQQPFPLQPQQPF	31.4	1921.98	16	985525197:229610232:225625626:229610226:229610234:985525189:229610228
		70	LGQQQPFPPQQPYPQPQPFPSQQPY	31.38	2921.41	25	807780690:74026517:807780716:154268814
		71	QLQPFPQPQPFPPQLPYPQPQ	31.1	2471.26	21	601292788:147883554
		72	LESQQPFPQQPQQPFPQPQ	30.82	2248.09	19	208605344:1282798551:1389714864:1863295324:513130101:555948509:555948503
		73	TQQPQQPFPQLQQPQQPFPQPQ	30.76	2614.29	22	15148398:327178025:170738:513129914:205363294
		74	LQFPQQPEQIIPQQPQQPF	30.76	2290.17	19	208605344:1282798551:1389714864:1863295324:513130101:555948509:555948503
		75	VSFQQPQQQYPSGQG	30.69	1677.77	15	1101972374:2359685215:1184250144:902376029:1359931135:2123921187:807780690:74026515:421932402:421932484:7209265:147883558:90101520:147883548:21673:376341628:807780692:513129892:147883564:513129824
		76	NMQVDPSGQVQWPQQQPFPQPQQPF	30.67	2935.37	25	209971873:209971857:209971907
		77	QTQQPFPLQPQQPFPQQPQRPF	30.43	2661.35	22	985525197:229610232:225625626:229610226:229610234:985525189:229610228
		78	QLGQGQQSGQGQLGYYPTSPQ	30.13	2221.04	21	508732625:679602845:2569237645:2569237720:2569237705:915195099:634859891:2569237625:170743:110341791:21743:915195093:345846576:539759916:106640051:915195097
		79	NIQVDPSGQVQ	29.93	1183.58	11	15148398:327178025:170738:15148387:379319147:379319145:379319139:379319143:194718421:372292210:194718423:379319141
		80	VQGQGIIQPQQPAQ	29.85	1490.78	14	209971851:15148398:327178025:170738:1624701583:22797758:508732621:22797764:1624701627:1894521615:118772073:1282798543:1624701565:1624701631:1389713229:2234200180:478683587:513129961:4836789:10638230:10638290:34329285:1729914728:209971843:15148387:260401168:209971853:421932703:209971885:209971911:209971873:209971857:209971883:379319147:379319145:379319139:379319143:194718421:372292210:194718423:37…
		81	SQPQQQFPQPQQPQQSFPQQQPPFIQPS	29.71	3274.58	28	1624701583:22797758:508732621:22797764:1624701627:1894521615:118772073:1282798543:1624701565:1624701631:1389713229:2234200180:478683587:513129961:4836789:10638230:10638290:34329285:1729914728:513129918:209971873:209971857
		82	NIQVDPSGQ	29.7	956.456	9	15148398:327178025:170738:15148387:379319147:379319145:379319139:379319143:194718421:372292210:194718423:379319141
		83	PQQPPFSQQQQPV	29.69	1507.74	13	51870700:44885908:169666941:169666937:169666929:56480818:163860188:56480804:56480776:56480816:56480810:164470666:56480802:56480786:56480814:56480792:56480780:56480798:17425212:56480796:194718429:56480820:56480794:85815962:56480784:56480790:56480782:56480788:56480812:56480800:9967353:1857658:39923010:85815960:1857654:39923100:21773:85815958:223007038:123204244:223007036:17425182
		84	QSFPLQPQQPFPQQPQQPFPQPQLPFPQ	29.13	3298.66	28	508732623:1389715110:1282798550:1863295322:1389715540:1282798552:1863295309:555948505
		85	WQELGQGQQGYYPT	29.09	1653.74	14	570441545:2569237914:2569237885:2569237855:2569237814:584090046:2123603159:557367908:2569237937:2569237794:226223:22090:110341796:14329763:346680615:359500291
		86	LQPQQPFPQQPQQPYPQQPQQPFPQ	28.99	2998.47	25	209971851:1624701583:22797758:508732621:22797764:1624701627:1894521615:118772073:1282798543:1624701565:1624701631:1389713229:2234200180:478683587:513129961:4836789:10638230:10638290:34329285:1729914728:513129918:205363294
		87	LQLQPFPQPQLPYPQPQLPYPQPQLPYPQPQPF	28.93	3909.03	33	421932500:902375991:7209265:147883558:90101520:147883548:21673
		88	SQQQQQQLFPQQPS	28.92	1670.8	14	9967353:1857658:39923010:85815960:1857654:39923100:21773:85815958:223007038:123204244:223007036
		89	LQLQPFPQPQLPYPQPQLPYPQPQP	28.79	2938.54	25	421932402:421932484:807780680:421932462
		90	VQWPQQQPFPQPQQPF	28.77	1978.97	16	209971873:209971857:209971907
		91	LGQQQPFPPQQPYPQPQPFPS	28.55	2405.18	21	807780690:74026517:807780716:154268814:147883546:21755:170720:421932526
		92	EQSYPQQPYPS	28.54	1322.58	11	985525197:229610232:225625626:229610226:229610234:985525189:229610228:225625614
		93	VSFQQPQQQYPSGQ	28.43	1620.75	14	1101972374:2359685215:1184250144:902376029:1359931135:2123921187:807780690:74026515:421932402:421932484:7209265:147883558:90101520:147883548:21673:376341628:807780692:513129892:147883564:513129824
		94	QSGQGQPGYYPT	28.35	1281.56	12	21749:110341797:109452233:164504882:262205164:164504881:71084277:347952129:347952125:347952131:347952127:346680613:570441559:1512470134:94315065:459353913:2569237768:45387433:641467845:508732625:679602845:2569237645:2569237720:2569237705:915195099:634859891:2569237625:170743:110341791:21743:915195093:345846576:539759916:106640051:915195097:662357279:873859815:2123620161:2123620159:601093911:21236…
		95	PQQPPFSQQQQQQILPQQPPFSQQQHPV	28.23	3292.64	28	169666931
		96	SYQQPQQQYPSGQG	28.21	1594.7	14	383210736:902375939:383210737
		97	AQLPFPQQPQQPFPQPQQPQQPFPQ	28.08	2925.46	25	209971843:260401168:209971853:421932703:209971885:209971911:209971907
		98	SEQGQQPGQGK	28.08	1142.53	11	21749:110341797:109452233:164504882:262205164:164504881:71084277:347952129:347952125:347952131:347952127:346680613:570441559:1512470134:94315065:459353913:2569237768:45387433:641467845:584090044
		99	RPQQPYPQPQPQ	28.02	1462.73	12	1101972374:2359685215:1184250144:902376029:1359931135:2123921187:807780690:74026515:421932402:421932484:807780680:807780718:74026517:807780682:807780716:376341628:154268814:513129892:147883546:21755:170720:421932526
		100	MQLQPFPQPQLPYPQPQLPYPQPQPF	28.01	3103.56	26	807780682:807780692:807780664
		101	VQIIPQQPQQPFPL	27.74	1631.9	14	2123577445
		102	SFQPSQLNPQAQGSVQPQ	27.62	1939.94	18	807780682:147883554:1256786:902375957:902376089:902376111:1389813673:1258169874
		103	QLPGQGQQGYYPT	27.58	1435.67	13	570441545
		104	LVQGQGIIQPQQPA	27.35	1475.81	14	209971851:15148398:327178025:170738:1624701583:22797758:508732621:22797764:1624701627:1894521615:118772073:1282798543:1624701565:1624701631:1389713229:2234200180:478683587:513129961:4836789:10638230:10638290:34329285:1729914728:209971843:15148387:260401168:209971853:421932703:209971885:209971911:209971873:209971857:209971883:379319147:379319145:379319139:379319143:194718421:372292210:194718423:37…
		105	SQQQPPFWQQQPPFSQQQPILPQQPPFS	27.25	3317.63	28	56480818:163860188:56480804:56480776:56480816:56480810:164470666:56480802:56480786:56480814:56480792:56480780:56480798:17425212:56480796:194718429:56480820:56480794:85815962:56480784:56480790:56480782:56480788:56480812:56480800:9967353:1857658:39923010:85815960:1857654:39923100:21773:85815958:223007038:123204244:223007036
		106	VSFQPSQLNPQ	27.23	1243.62	11	807780682:147883554:1256786:902375957:902376089:902376111:1389813673:1258169874
		107	SQQQPPFWQQQPPFSQQQPI	27.04	2423.17	20	56480818:163860188:56480804:56480776:56480816:56480810:164470666:56480802:56480786:56480814:56480792:56480780:56480798:17425212:56480796:194718429:56480820:56480794:85815962:56480784:56480790:56480782:56480788:56480812:56480800:9967353:1857658:39923010:85815960:1857654:39923100:21773:85815958:223007038:123204244:223007036
		108	FQQPHQPFPQPQ	26.98	1477.71	12	513129959
		109	LQLQPFPQPQLPYPQPQP	26.87	2115.12	18	807780690:74026515:807780718:74026517
		110	VVQIIPQQPQQPFPL	26.73	1730.97	15	2123577445
		111	RQLNPSEQELQSPQQPVPK	26.64	2202.14	19	985525197:229610232:225625626:229610226:229610234:985525189:229610228:225625614
		112	LQLQPFPQPQLP	26.44	1404.78	12	1101972374:2359685215:1184250144:902376029:1359931135:2123921187:807780690:74026515:421932402:421932484:421932500:902375991:807780680:807780718:7209265:147883558:90101520:147883548:21673:74026517:421932462:807780716:154268814:513129892:147883546:21755:170720:421932526
		113	SQQPFPLQPQQPF	26.44	1540.77	13	985525197:229610232:225625626:229610226:229610234:985525189:229610228
		114	SLQQPGQGQQIGQGQQGYYPTSPQ	26.39	2574.21	24	570441545:2569237914:2569237885:2569237855:2569237814:584090046:2123603159:557367908:2569237937:2569237794:226223:22090:110341796:14329763:346680615:359500291
		115	VSFQQPQQQYPSS	26.36	1522.71	13	421932500:601292788:807780682:147883554:1256786:902375957:902376089:902376111:1389813673:1258169874:21765:170718
		116	LSGQGQRPGQ	26.05	1026.52	10	662357279:873859815:2123620161:2123620159:601093911:2123620157:478428127:399933061:294719862:296280726:50512298:736319:26515125:61966513:194077448:162415985:110341804:288860106:226088593:262205115
		117	RPQQPYPQSQPQ	25.89	1452.71	12	421932500:902375991:7209265:147883558:90101520:147883548:21673
		118	SQQQLPPFSQQQQPPFSQQQQPVLPQQPS	25.8	3329.64	29	51870700:44885908:169666941:169666937:169666929:169666931
		119	YQQPQHTFPQPQ	25.68	1497.7	12	260401168:209971853:421932703:209971885
		120	SQQQLPPFSQQLPPFSQQQQPV	25.62	2536.27	22	51870700:44885908:169666941:169666937:169666929:169666931
		121	LVLPQQQIPF	25.61	1181.68	10	335331566:56480740
		122	MQLQPFPQPQLPYPQPQLPYPQPQP	25.53	2956.49	25	807780682:807780692:807780664
		123	LQLQPFPQPQPFLPQLPYPQPQ	24.96	2600.38	22	807780726:1256786:902375957:902376089:902376111:1389813673:1258169874:21765:170718
		124	TQQSFPLQPQQPFPQQPQQPFPQPQ	24.85	2945.45	25	508732623:1389715110:1282798550:1863295322:1389715540:1282798552:1863295309:555948505:208605344:1282798551:1389714864:1863295324:513130101:555948509:555948503
		125	LQPHQIAQLEVMTSIALR	24.83	2047.12	18	51870700:44885908:169666941:169666937:169666929:56480818:163860188:56480804:56480776:56480816:56480810:164470666:56480802:56480786:56480814:56480792:56480780:56480798:17425212:56480796:194718429:56480820:56480794:85815962:56480784:56480790:56480782:56480788:56480812:56480800:9967353:1857658:39923010:85815960:1857654:39923100:21773:85815958:223007038:123204244:223007036:169666931:335331566:2154020…
		126	SQQPQQAFPQPQ	24.63	1382.66	12	513129959:513129914
		127	SQQPQQIFPQPQ	24.42	1424.7	12	15148387:209971911:209971883
		128	SQQPQQLFPQPQ	24.42	1424.7	12	440222343:440222345
		129	PELQQPIPQQPQQPFPLQPQQPFPQ	24.37	2934.5	25	508732623:1389715110:1282798550:1863295322:1389715540:1282798552:1863295309:555948505:208605344:1282798551:1389714864:1863295324:513130101:555948509:555948503
		130	ILQQPPFSQQQQPV	24.15	1636.86	14	31415653:17425196:322422042:17425194:537846383:85815954:108885285:485474972:17425192:336092053:56480735:56480733:162414846:85815956:260594504:164470674:56480737:260594496:108885287:201067352:201067350:260594494
		131	SQQQPPFWQQQPPFSQQQPILPQQPPFSQQ	24.14	3573.74	30	56480818:163860188:56480804:56480776:56480816:56480810:164470666:56480802:56480786:56480814:56480792:56480780:56480798:17425212:56480796:194718429:56480820:56480794:85815962:56480784:56480790:56480782:56480788:56480812:56480800:9967353:1857658:39923010:85815960:1857654:39923100:21773:85815958:223007038:123204244:223007036
		132	QTFPHQPQQQVPQPQQPQQPF	24.03	2512.22	21	15148398:327178025:170738:513129959:513129914
		133	QQYPLGQGSFRPSQQNPQAQGSVQPQ	23.96	2854.37	26	902375991:807780718:74026517:421932462:807780716:807780664:147883546:21755:170720:421932526:807780726
		134	SFQPSQLNPQ	23.92	1144.55	10	807780682:147883554:1256786:902375957:902376089:902376111:1389813673:1258169874
		135	QLPGQGQQGYYPTSPQ	23.82	1747.82	16	570441545
		136	LQLQPFPQPQPF	23.72	1438.76	12	601292788:147883554:807780726:513129824:1256786:902375957:902376089:902376111:1389813673:1258169874:21765:170718
		137	QLQPFPQPQLPYPQPQLPYPQPQPF	23.69	2972.52	25	421932402:421932484:807780680:807780682:421932462:807780692:807780664
		138	SHIPGLERPSQQQPLPPQQT	23.41	2237.16	20	51870700:44885908:169666941:169666937:169666929:169666931:335331566:17425182
		139	LQQQLVPQLQQPL	23	1531.87	13	15148398:327178025:170738
		140	VRFPVPQLQPQNPSQQQPQEQVPL	22.84	2781.46	24	147883546:21755:170720:421932526:147883564:902376097
		141	GGSFYPGETTPL	22.81	1224.57	12	570441545:2569237914:2569237885:2569237855:2569237814:584090046:2123603159:557367908:2569237937:2569237794:226223:22090:110341796:14329763:346680615:359500291
		142	VRVPVPQLQPQNPSQQQPQEQVPL	22.37	2733.46	24	1101972374:2359685215:1184250144:902376029:1359931135:2123921187:807780690:74026515:421932402:421932484:421932500:902375991:807780680:807780718:7209265:147883558:90101520:147883548:21673:74026517:601292788:421932462:807780716:147883554:376341628:807780692:154268814:513129892:513129824
		143	IISQRPQQPFPL	22.32	1422.8	12	985525197:229610232:225625626:229610226:229610234:985525189:229610228
		144	VRVPVPQLQPQNPSLQQPQEQVPL	22.27	2718.48	24	383210736:902375939:383210737
		145	LQPQQAFPQQPQQPFPQ	22.18	2006	17	513129959:513129914
		146	VPGLEKPW	22.13	924.507	8	56480740:31415653:17425196:322422042:17425194:537846383:85815954:108885285:485474972:17425192:336092053:56480735:56480733:162414846:85815956:260594504:164470674:56480737:260594496:108885287:201067352:201067350:260594494
		147	LPYPQPQLPYPQPQPF	22.06	1908.98	16	421932402:421932484:421932500:902375991:807780680:7209265:147883558:90101520:147883548:21673:807780682:421932462:807780692:807780664
		148	QLQPFPQPQLPYPQPQLPYPQPQLPYPQPQP	22.01	3648.88	31	421932500:902375991:7209265:147883558:90101520:147883548:21673
		149	LQQPPFSQQQQPV	21.74	1523.77	13	31415653:17425196:322422042:17425194:537846383:85815954:108885285:485474972:17425192:336092053:56480735:56480733:162414846:85815956:260594504:164470674:56480737:260594496:108885287:201067352:201067350:260594494
		150	LQPFPSQQPY	21.45	1203.59	10	807780682:807780692:513129892
		151	FPQPQQTFPHQPQQQVPQPQQPQQPF	21.39	3109.52	26	15148398:327178025:170738:513129959:513129914
		152	VYYPTSPQQPGQLQQPAQGQQGYYPTSPQ	21.22	3235.52	29	21749:110341797:164504882:262205164:164504881:71084277:347952129:347952125:347952131:347952127:346680613:570441559:1512470134:45387433
		153	LPYPQPQLPYPQPQLPYPQPQPF	21.11	2732.4	23	421932500:902375991:7209265:147883558:90101520:147883548:21673
		154	RVPVPQLQPQNPSQQQPQEQVPL	20.94	2634.39	23	1101972374:2359685215:1184250144:902376029:1359931135:2123921187:807780690:74026515:421932402:421932484:421932500:902375991:807780680:807780718:7209265:147883558:90101520:147883548:21673:74026517:601292788:421932462:807780716:147883554:376341628:807780692:154268814:513129892:513129824
		155	ASIVAGIGGQ	20.9	871.476	10	15148398:327178025:170738:513129918:513129959:379319147:379319145:379319139:379319143:194718421:372292210:379319141:205363294
		156	PVGIFGTN	20.6	803.418	8	1101972374:2359685215:421932402:7209265:147883558:90101520:147883548:21673:154268814
		157	SQQQQVGQGSL	20.5	1158.56	11	15148398:327178025:205363294
		158	VQWPQQQPF	20.27	1156.57	9	260401168:209971853:421932703:209971885:209971911:209971873:209971857:209971883:209971907:379319147:379319145:379319139:379319143:194718421:372292210:194718423:379319141
